# Supplementary material for: Thermal decomposition and isomerization of furfural and 2-pyrone: a theoretical kinetic study
Source: Royal Society of Chemistry journal article supplement (doi:10.1039/d0cp05523a), 2020-12-17
Supplement: d0cp05523a1.pdf [file d0cp05523a1.pdf]

## Thermal Decomposition and Isomerization of Furfural and 2-Pyrone: A Theoretical Kinetic Study

Saddam Al-Hammadi<sup>a</sup> and Gabriel da Silva<sup>a\*</sup>

<sup>a</sup> Department of Chemical Engineering, The University of Melbourne, Melbourne, Victoria 3010, Australia.

\* Corresponding Author Email, [gdasilva@unimelb.edu.au](mailto:gdasilva@unimelb.edu.au).

### Contents

|                                                                                                                                  |    |
|----------------------------------------------------------------------------------------------------------------------------------|----|
| 1. Chemical structures, names and symbols of the molecules included in the pyrolysis process. ....                               | 2  |
| 2. Optimized structures of furfural and 2-pyrone pyrolysis intermediates and products. ....                                      | 4  |
| 3. Optimized structures for transition-state of furfural and 2-pyrone pyrolysis.....                                             | 8  |
| 4. Structural parameters for furfural and 2-pyrone pyrolysis intermediates and products, calculated at G4 level of energy. ....  | 12 |
| 5. Structural parameters for furfural and 2-pyrone pyrolysis transition-state geometries, calculated at G4 level of energy. .... | 23 |
| 6. Master equation parameters, rate coefficients calculations and comparing with the experimental results.....                   | 36 |
| 7. Rate coefficients of furfural pyrolysis to its products as a function of temperature and pressure. ....                       | 41 |
| 8. Branching Ratio of furfural and 2-pyrone pyrolysis products as function of temperature and pressure. ....                     | 44 |

**1. Chemical structures, names and symbols of the molecules included in the pyrolysis process.**

| Symbols | Naming                 | Chemical Structure                                                                    |
|---------|------------------------|---------------------------------------------------------------------------------------|
| -       | Furan                  | 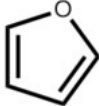   |
| VK      | Vinylketene            |    |
| M1      | Furfural               |    |
| M2      | 2-Pyrone               |   |
| M3      | 3-Furfural             |  |
| M4      | Formylvinylketene      |  |
| M5      | 2-Carbene-3-furfural   |  |
| M6      | Furfural-4-carbene     |  |
| M7      | 2-Keto-3,4-pentadienal |  |

|                               |                                      |                                                                                       |
|-------------------------------|--------------------------------------|---------------------------------------------------------------------------------------|
| M8                            | 2-Oxabicyclo[2.2.0]hex-5-en-3-one    | 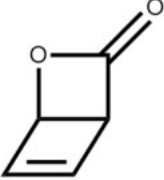   |
| M9                            | 2-Pyrone-5-carbene                   |    |
| M11                           | 2-Pyrone-4-carbene                   |    |
| M12                           | 3-Methylene-2(3H)-furanone           |    |
| M13                           | 3-Methylene-2(3H)-furanone-4-carbene |   |
| M14                           | 2-Pyrone-6-carbene                   |  |
| M16                           | 4-pyrone                             |  |
| CBD                           | 1,3-Cyclobutadiene                   |  |
| C <sub>4</sub> H <sub>4</sub> | Butatriene                           | $\equiv\text{C}=\text{C}\equiv$                                                       |

## 2. Optimized structures of furfural and 2-pyrone pyrolysis intermediates and products.

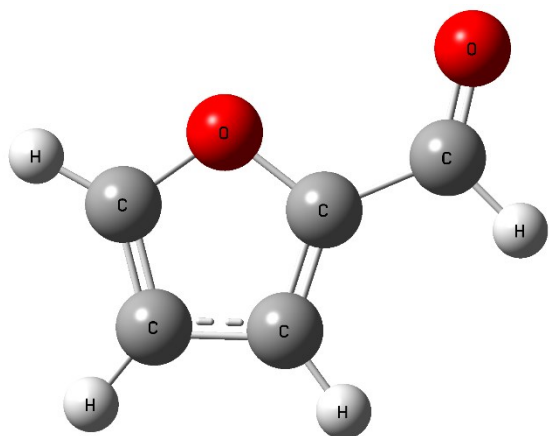

**Furfural**

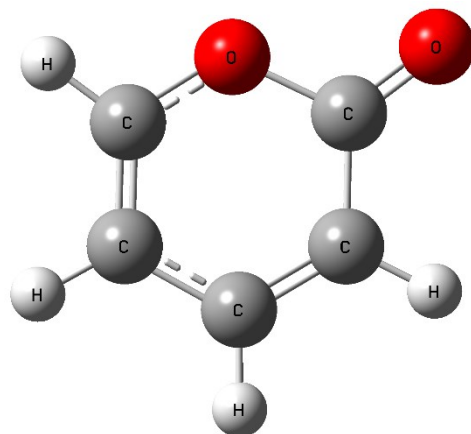

**2-Pyrone**

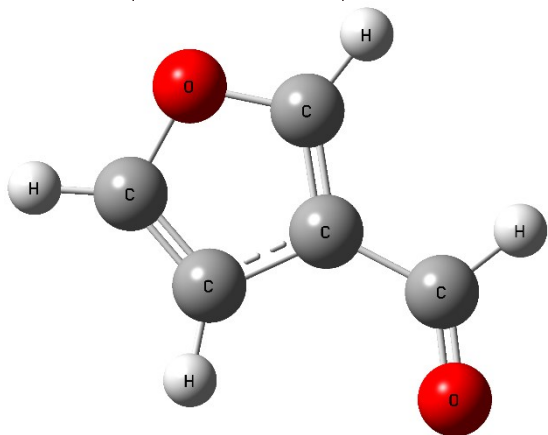

**M3**

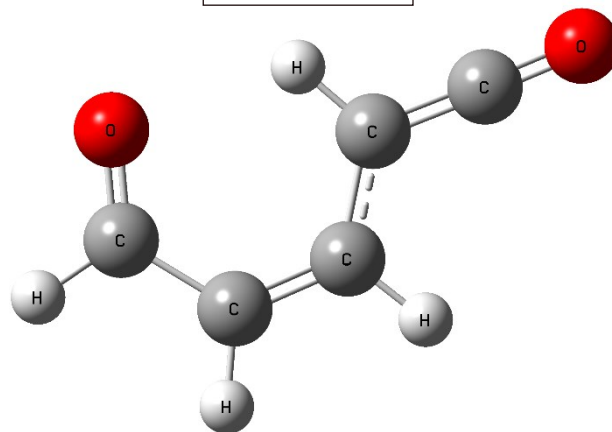

**M4**

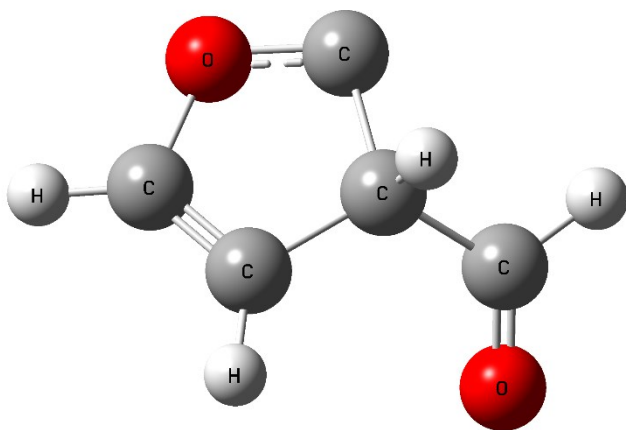

**M5**

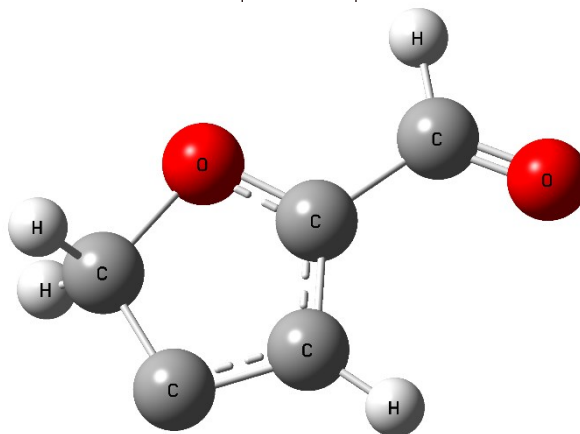

**M6**

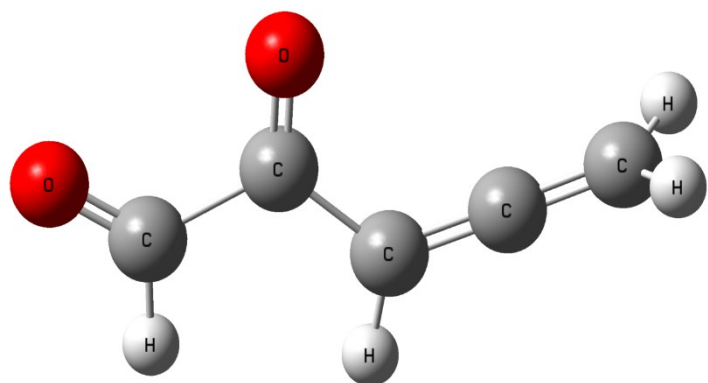

M7

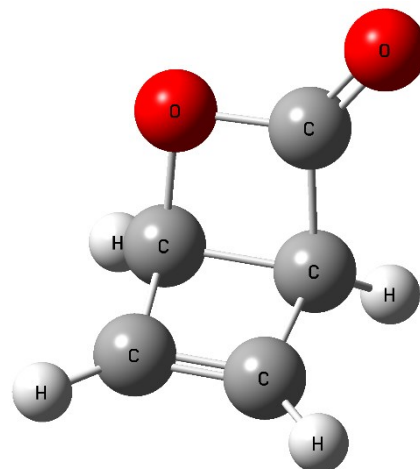

M8

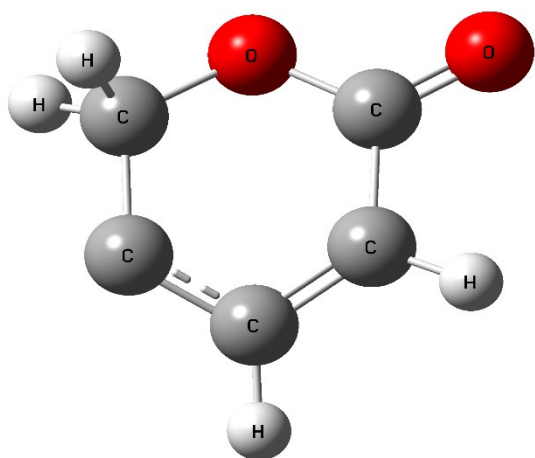

M9

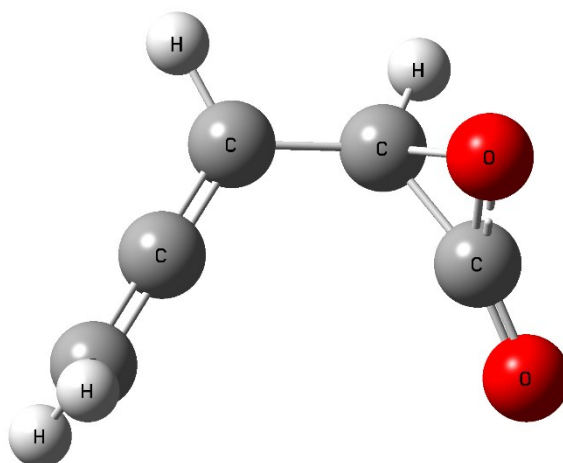

M10

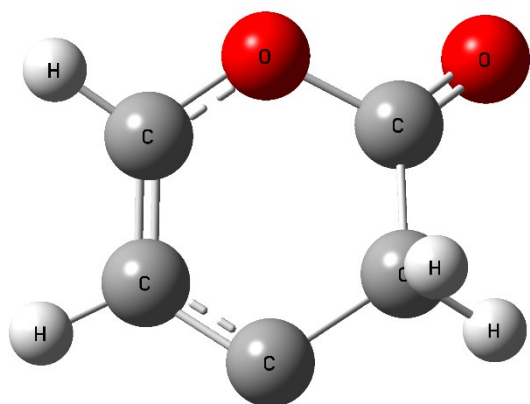

M11

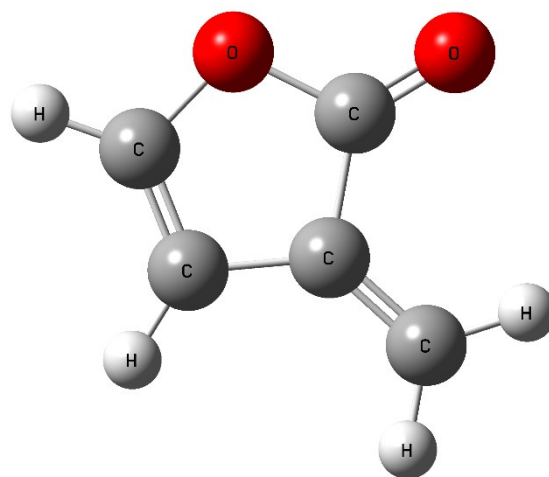

M12

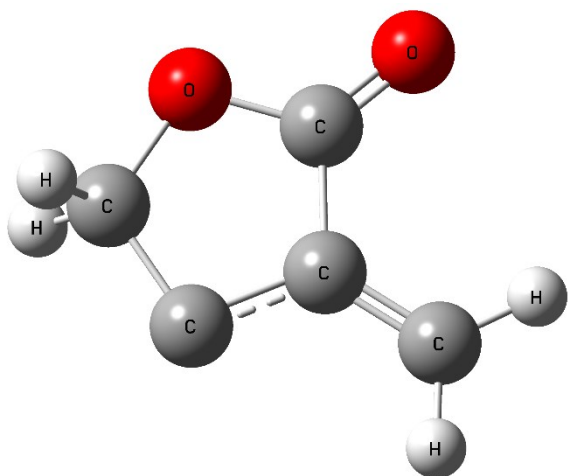

M13

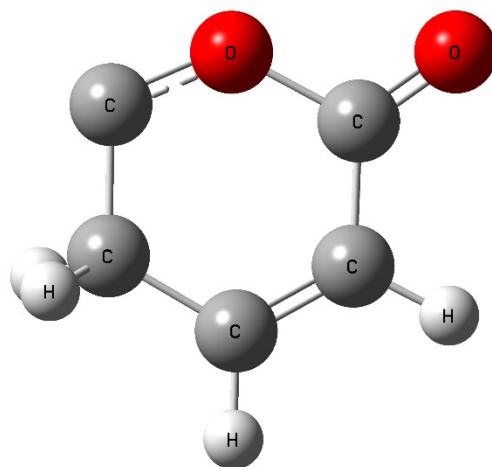

M14

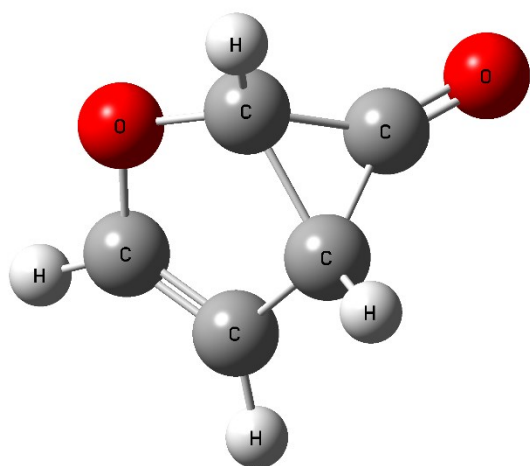

M15

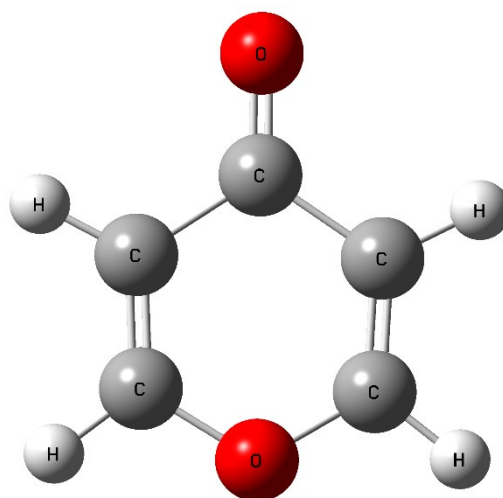

M16

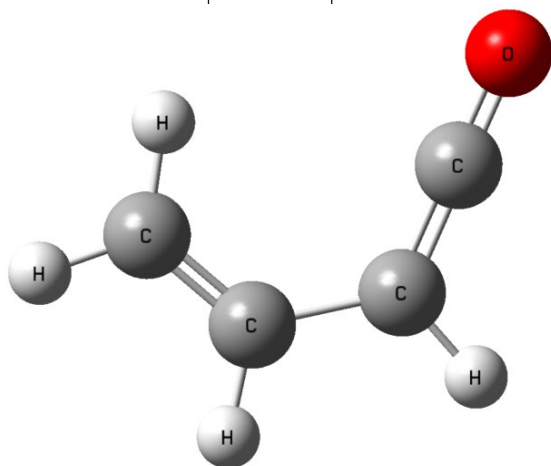

VK

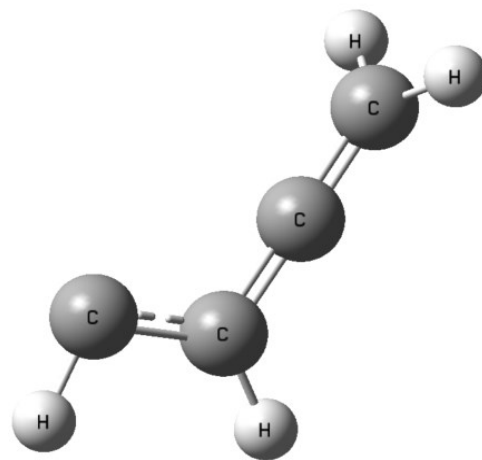

C<sub>4</sub>H<sub>4</sub>

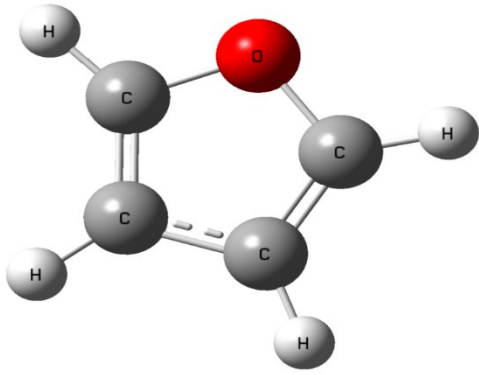

**Furan**

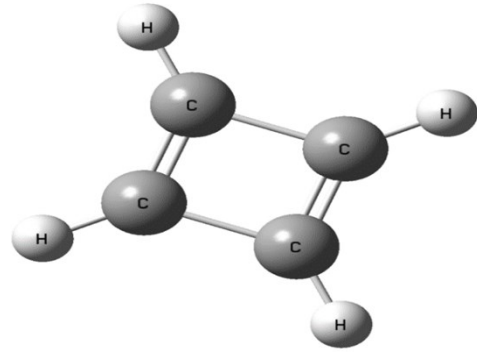

**CBD**

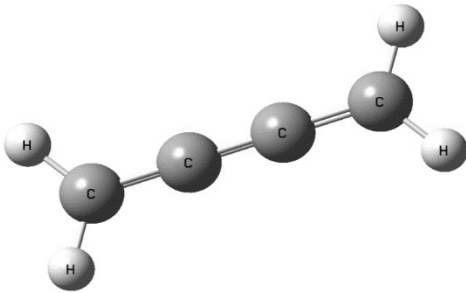

**C<sub>4</sub>H<sub>4</sub>**

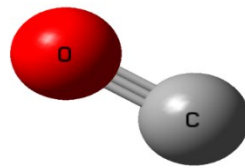

**CO**

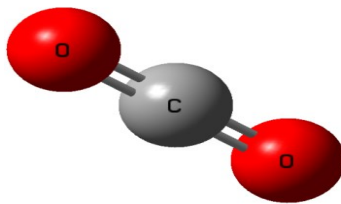

**CO<sub>2</sub>**

### 3. Optimized structures for transition-state of furfural and 2-pyrone pyrolysis.

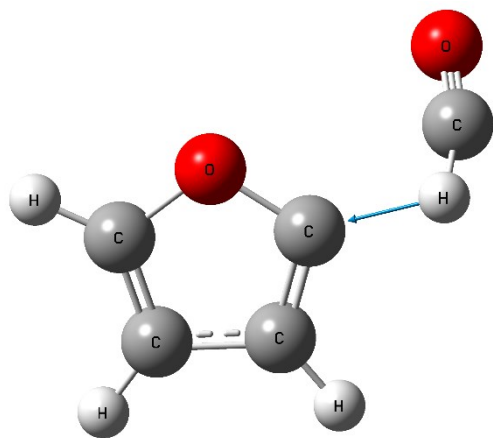

TS1

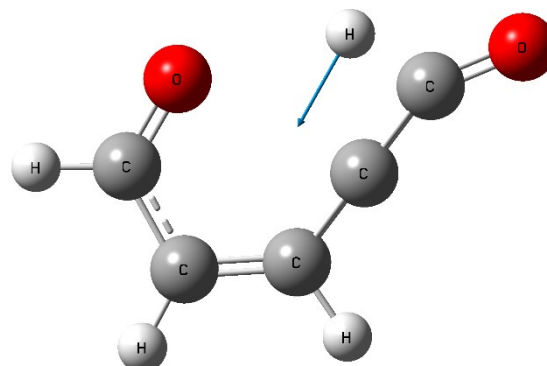

TS2

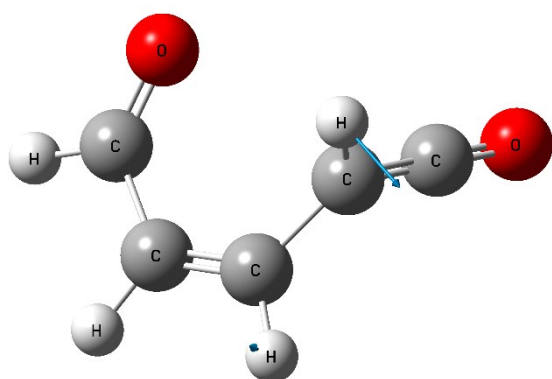

TS3

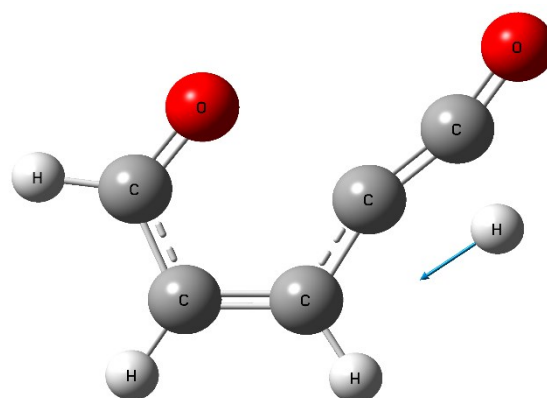

TS4

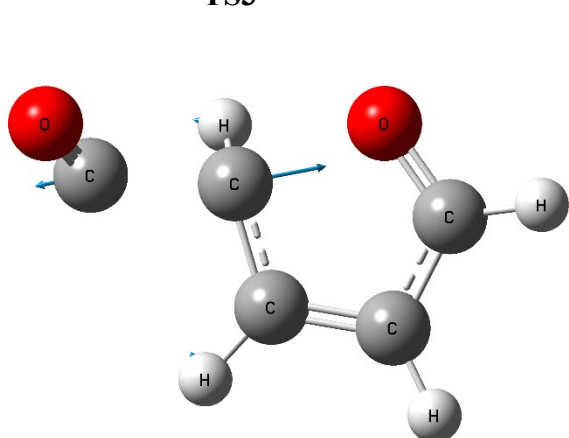

TS5

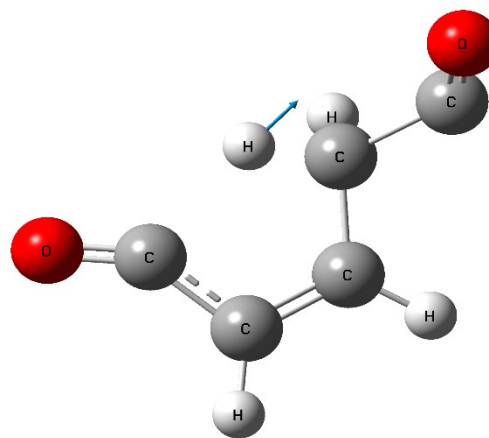

TS6



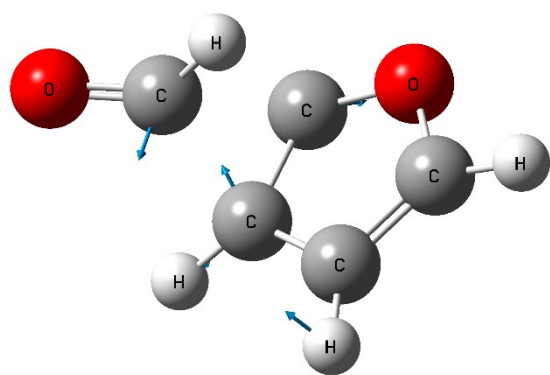

**TS7**

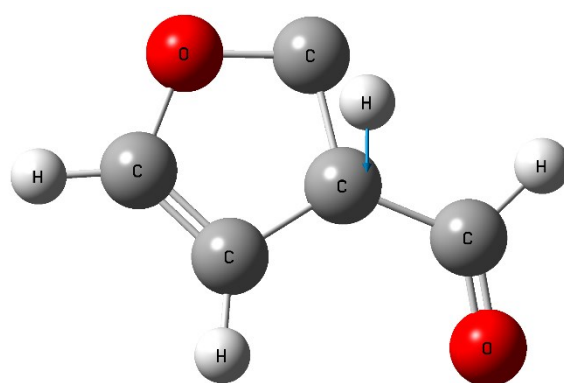

**TS8**

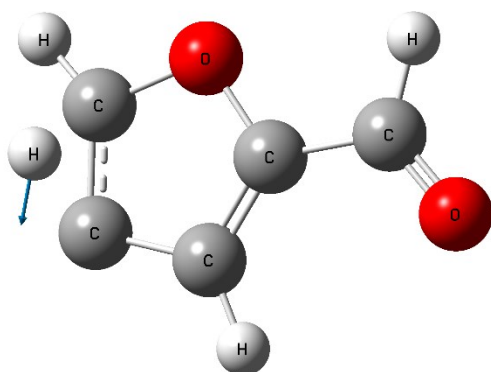

**TS9**

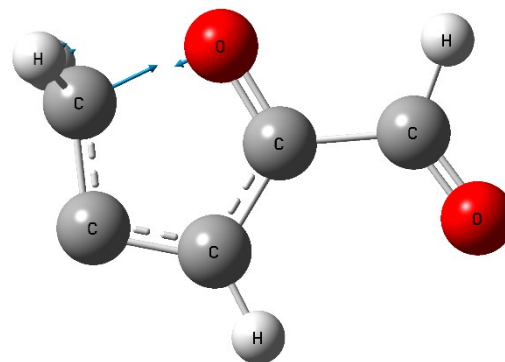

**TS10**

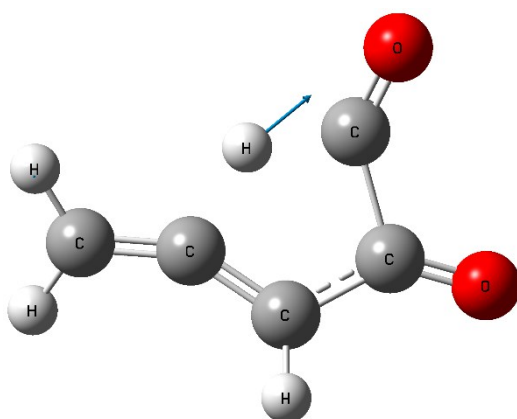

**TS11**

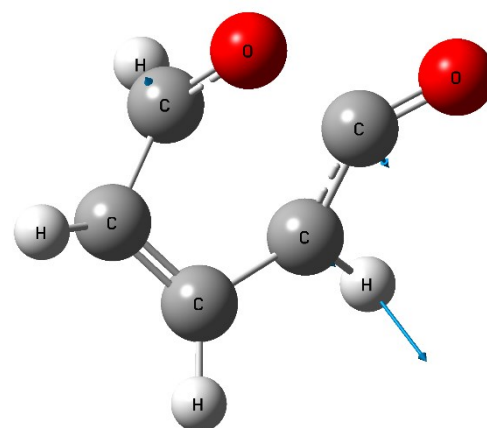

**TS12**



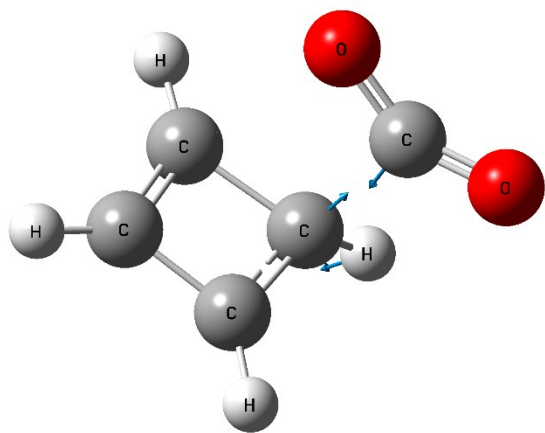

**TS13**

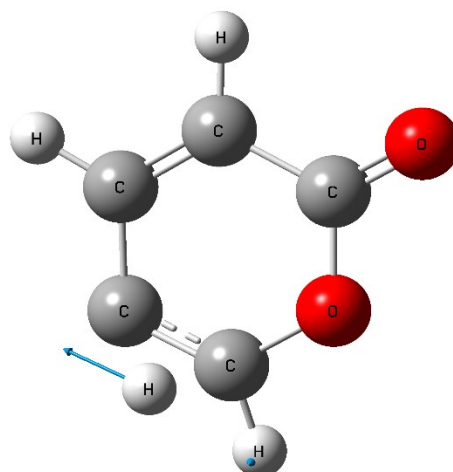

**TS14**

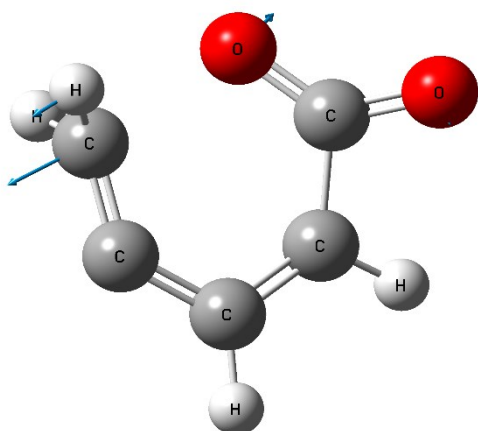

**TS15**

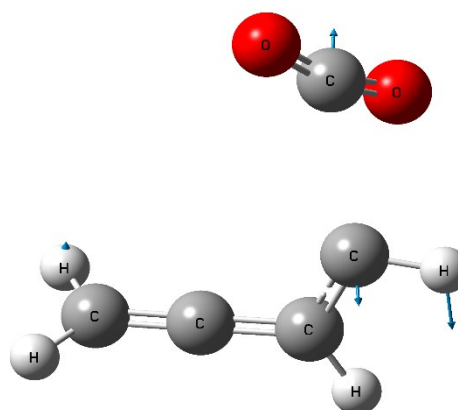

**TS16**

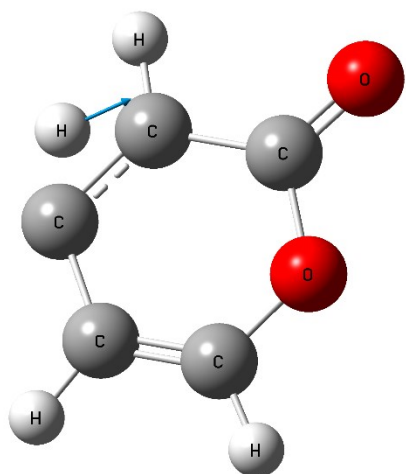

**TS17**

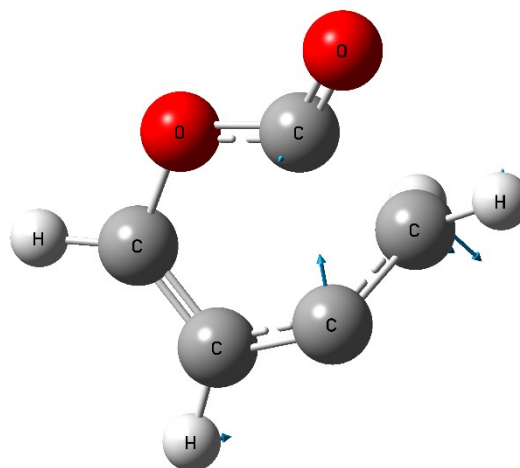

**TS18**



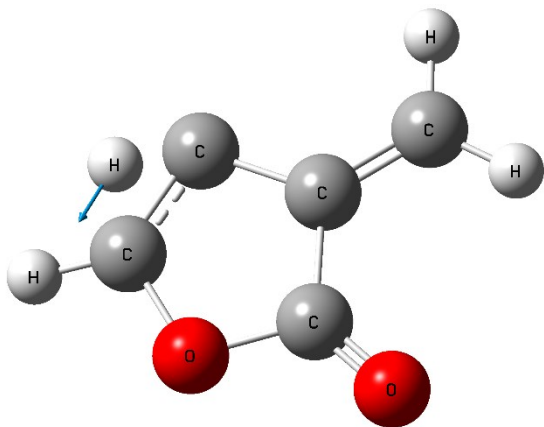

TS19

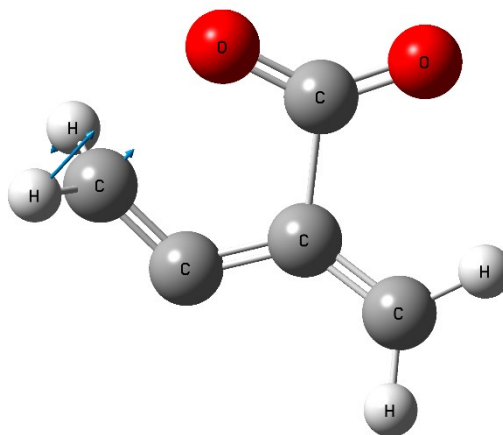

TS20

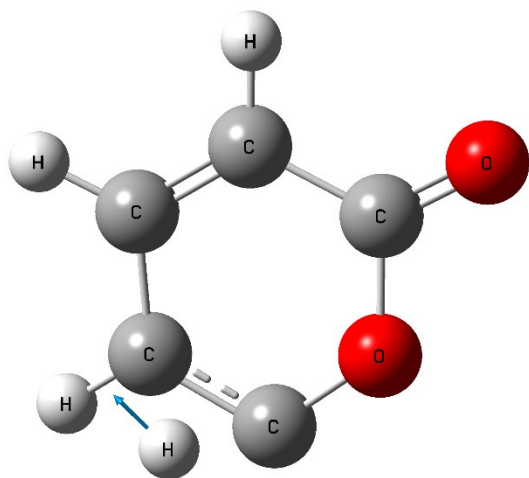

TS21

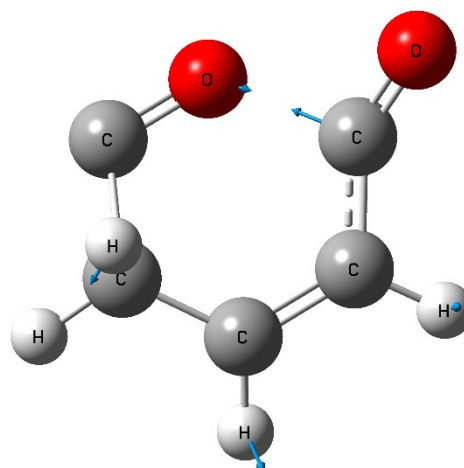

TS22

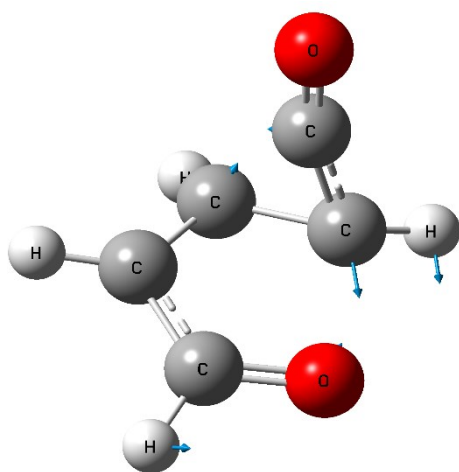

TS23

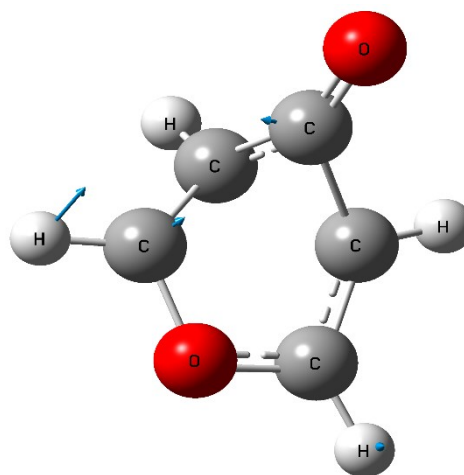

TS24



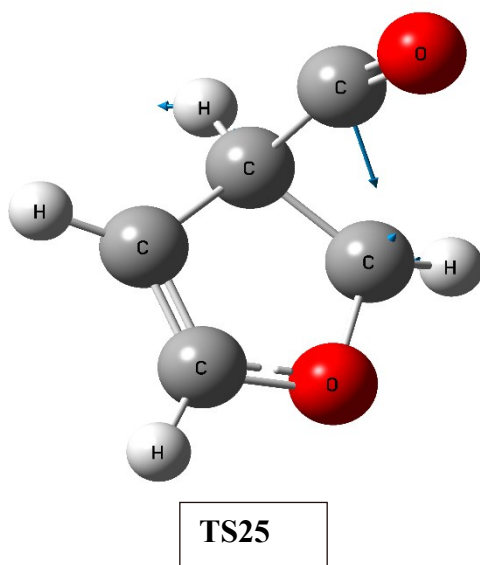

**4. Structural parameters for furfural and 2-pyrone pyrolysis intermediates and products, calculated at G4 level of energy.**

| <b>Furfural</b> |          |          |          |
|-----------------|----------|----------|----------|
| C               | 0.95465  | -2.71996 | -4.56879 |
| C               | 2.29815  | -2.71891 | -4.48869 |
| C               | 2.71772  | -1.27691 | -4.36167 |
| C               | 1.58678  | -0.54744 | -4.37739 |
| O               | 0.40463  | -1.39497 | -4.32248 |
| H               | 2.94234  | -3.57264 | -4.5213  |
| H               | 3.71838  | -0.90553 | -4.28637 |
| H               | 1.56002  | 0.5211   | -4.42646 |
| C               | 0.10619  | -3.96577 | -4.88452 |
| H               | 0.58281  | -4.90833 | -5.05569 |
| O               | -1.14767 | -3.87524 | -4.94121 |

---

**2-Pyrone**

---

|   |          |          |          |
|---|----------|----------|----------|
| O | 0.32412  | 0.06367  | -0.16579 |
| C | 0.17252  | 0.02314  | 1.16721  |
| C | 1.21103  | -0.01915 | 2.02767  |
| C | 2.53195  | -0.0203  | 1.47826  |
| C | 2.72021  | 0.02001  | 0.13602  |
| C | 1.60386  | 0.06543  | -0.78796 |
| H | 3.38734  | -0.05379 | 2.14433  |
| H | 1.03436  | -0.05075 | 3.09322  |
| H | -0.87109 | 0.02872  | 1.45609  |
| O | 1.63321  | 0.10334  | -1.98526 |
| H | 3.70329  | 0.02049  | -0.31492 |

---

**M3**

---

|   |          |    |          |
|---|----------|----|----------|
| C | 0.00748  | 0. | -0.00554 |
| O | -0.01475 | 0. | 1.34298  |
| C | 1.29267  | 0. | 1.76508  |
| C | 2.13291  | 0. | 0.70612  |
| C | 1.29601  | 0. | -0.46532 |
| C | 1.71891  | 0. | -1.8655  |
| H | 3.2103   | 0. | 0.71877  |
| H | 1.43273  | 0. | 2.83231  |
| H | -0.95068 | 0. | -0.49903 |
| O | 2.87396  | 0. | -2.22873 |
| H | 0.88825  | 0. | -2.60335 |



---

**M4**

---

|   |          |    |          |
|---|----------|----|----------|
| C | 0.03244  | 0. | -0.04076 |
| C | 0.006    | 0. | 1.28336  |
| C | 1.1929   | 0. | 2.09342  |
| C | 1.21326  | 0. | 3.45048  |
| C | 0.03013  | 0. | 4.30499  |
| O | -1.13013 | 0. | 3.92428  |
| O | 0.03101  | 0. | -1.19648 |
| H | -0.96745 | 0. | 1.76549  |
| H | 2.14468  | 0. | 1.56999  |
| H | 2.17278  | 0. | 3.95547  |
| H | 0.24873  | 0. | 5.39291  |

---

**M5**

---

|   |          |          |          |
|---|----------|----------|----------|
| C | -2.0948  | 0.39755  | 0.       |
| C | -2.07524 | 0.35404  | 1.49803  |
| C | -0.8061  | 0.23264  | 1.8497   |
| O | 0.03699  | 0.21226  | 0.69155  |
| C | -0.63167 | 0.33205  | -0.4347  |
| H | -2.92736 | 0.42031  | 2.15447  |
| C | -2.85732 | 1.5352   | -0.67326 |
| H | -0.28365 | 0.15692  | 2.78931  |
| H | -2.52002 | -0.52508 | -0.43751 |
| O | -3.54272 | 2.32272  | -0.08107 |
| H | -2.73029 | 1.56926  | -1.77198 |

---

**M6**

---

|   |          |          |          |
|---|----------|----------|----------|
| C | -0.76453 | -0.68807 | 0.       |
| O | -0.83556 | -0.68939 | 1.30023  |
| C | 0.67712  | -0.69426 | 1.70716  |
| C | 1.47648  | -0.69515 | 0.50148  |
| C | 0.52523  | -0.69117 | -0.53457 |
| C | -2.07489 | -0.68344 | -0.73353 |
| O | -2.13594 | -0.68186 | -1.93469 |
| H | 0.71631  | -0.69047 | -1.59888 |
| H | 0.77986  | -1.58943 | 2.32493  |
| H | -2.97143 | -0.68161 | -0.08561 |
| H | 0.78506  | 0.19881  | 2.32707  |

---

**M7**

---

|   |          |          |          |
|---|----------|----------|----------|
| C | -0.22838 | 0.6953   | 0.26237  |
| C | 0.4268   | -0.48114 | -0.48484 |
| O | -0.28338 | -1.42591 | -0.91685 |
| C | -2.91111 | 0.73098  | 0.64697  |
| C | -1.56974 | 0.71314  | 0.45467  |
| C | 1.95108  | -0.50141 | -0.70336 |
| O | 2.48646  | -1.46274 | -1.31394 |
| H | 0.37548  | 1.49862  | 0.62971  |
| H | -3.36634 | 1.54841  | 1.16608  |
| H | 2.55494  | 0.3019   | -0.33602 |
| H | -3.51497 | -0.07237 | 0.27969  |

---

**M8**

---

|   |          |          |          |
|---|----------|----------|----------|
| C | 0.2392   | -0.0463  | 0.       |
| C | 1.2662   | -0.68686 | -0.90807 |
| C | 0.81907  | -1.91997 | -0.66281 |
| C | -0.2858  | -1.46925 | 0.28199  |
| O | -1.00198 | 0.29647  | -0.68258 |
| H | 2.01299  | -0.27046 | -1.56946 |
| H | 1.07594  | -2.90452 | -1.0305  |
| C | -1.52518 | -0.94537 | -0.451   |
| O | -2.59806 | -1.3444  | -0.74958 |
| H | -0.41362 | -1.91342 | 1.26527  |
| H | 0.49955  | 0.67955  | 0.76553  |

---

**M9**

---

|   |          |          |          |
|---|----------|----------|----------|
| O | 0.34231  | -1.1669  | 0.03466  |
| C | -1.0849  | -1.13703 | -0.00491 |
| C | -1.88874 | 0.02505  | -0.16176 |
| C | -1.11088 | 1.24856  | 0.02244  |
| C | 0.23768  | 1.24523  | 0.00304  |
| C | 1.03661  | -0.00109 | -0.00648 |
| H | -1.64529 | 2.19537  | 0.08569  |
| H | -1.50407 | -1.13232 | 1.06168  |
| H | -1.41367 | -2.09935 | -0.40907 |
| O | 2.23925  | -0.01785 | -0.02091 |
| H | 0.83691  | 2.1525   | 0.02023  |

---

**M10**

---

|   |          |          |          |
|---|----------|----------|----------|
| O | 1.86766  | -1.24397 | -0.57055 |
| C | -2.5124  | -1.09215 | 0.23539  |
| C | -1.85277 | 0.00448  | 0.06092  |
| C | -1.15333 | 1.12355  | -0.12115 |
| C | 0.1672   | 1.00451  | -0.66545 |
| C | 1.63131  | -0.25933 | 0.02873  |
| H | -1.63336 | 2.07589  | 0.13086  |
| H | -2.45628 | -1.63558 | 1.17557  |
| H | -3.12797 | -1.50807 | -0.55894 |
| O | 1.75337  | 0.53283  | 0.92199  |
| H | 0.62424  | 1.99803  | -0.80465 |

---

**M11**

---

|   |          |          |          |
|---|----------|----------|----------|
| O | 0.02286  | -1.21756 | 0.16226  |
| C | -1.34012 | -0.87486 | 0.14788  |
| C | -1.66656 | 0.38096  | -0.18294 |
| C | -0.58463 | 1.24526  | -0.58349 |
| C | 0.4257   | 1.29264  | 0.44374  |
| C | 0.91535  | -0.23257 | 0.00537  |
| H | 0.17979  | 1.17407  | 1.51706  |
| H | -2.7018  | 0.66657  | -0.34407 |
| H | -1.96725 | -1.74914 | 0.22292  |
| O | 2.06119  | -0.40438 | -0.25115 |
| H | 1.29841  | 1.92794  | 0.26191  |

---

**M12**

---

|   |          |          |          |
|---|----------|----------|----------|
| O | -0.00714 | -1.22256 | 0.17226  |
| C | -1.36012 | -0.89986 | 0.13788  |
| C | -1.63656 | 0.36096  | -0.19294 |
| C | -0.41963 | 1.08026  | -0.53849 |
| C | 0.3957   | 1.44764  | 0.52374  |
| C | 0.85035  | -0.24257 | -0.12964 |
| H | 0.09979  | 1.45907  | 1.58206  |
| H | -2.6368  | 0.76657  | -0.27907 |
| H | -1.99225 | -1.75414 | 0.32792  |
| O | 2.03118  | -0.36938 | -0.25615 |
| H | 1.37841  | 1.87294  | 0.30691  |

---

**M13**

---

|   |          |          |          |
|---|----------|----------|----------|
| O | 1.51372  | 0.24378  | 0.74192  |
| C | 1.75538  | -0.78929 | -0.31084 |
| C | 0.4907   | -1.12806 | -0.47369 |
| C | -0.74551 | -0.54915 | -0.0484  |
| C | -2.05365 | -0.85687 | -0.22347 |
| C | 0.02075  | 0.58428  | 0.6749   |
| H | -2.32862 | -1.72073 | -0.79183 |
| H | 2.40977  | -1.57014 | 0.01618  |
| H | 2.15561  | -0.38866 | -1.21871 |
| O | -0.50493 | 1.62547  | 1.1473   |
| H | -2.81152 | -0.23598 | 0.20667  |

---

**M14**

---

|   |          |          |          |
|---|----------|----------|----------|
| O | 0.36119  | -1.20193 | 0.00012  |
| C | -0.93666 | -1.41134 | -0.00011 |
| C | -1.77162 | -0.14589 | -0.00006 |
| C | -1.09901 | 1.18112  | -0.00001 |
| C | 0.2348   | 1.26602  | 0.00005  |
| C | 1.06216  | 0.06803  | 0.00003  |
| H | -1.70693 | 2.0841   | 0.00001  |
| H | -2.45783 | -0.24953 | -0.85611 |
| H | -2.45727 | -0.24976 | 0.85642  |
| O | 2.2521   | 0.00989  | -0.00009 |
| H | 0.77775  | 2.20391  | 0.00007  |

---

**M15**

---

|   |          |          |          |
|---|----------|----------|----------|
| C | -0.26693 | 0.46298  | 0.91179  |
| C | 0.10692  | -0.96314 | 0.53164  |
| C | 1.55804  | 0.31773  | -0.55051 |
| H | 0.07299  | -1.79784 | 1.23464  |
| H | 2.40038  | 0.4993   | -1.20894 |
| C | -1.34199 | 0.07649  | 0.06324  |
| H | -0.39244 | 0.86811  | 1.94087  |
| O | -2.26328 | -0.09407 | -0.6957  |
| O | 1.30435  | -0.96237 | -0.28294 |
| C | 0.74949  | 1.2115   | 0.03796  |
| H | 0.78232  | 2.28617  | -0.04719 |

---

**M16**

---

|   |          |          |          |
|---|----------|----------|----------|
| C | -1.29467 | 0.93763  | 0.1292   |
| C | 0.01756  | 0.98156  | -0.39339 |
| C | 0.32641  | -0.63799 | -0.88284 |
| C | -0.68011 | -1.16604 | 0.07372  |
| O | -1.58202 | -0.2913  | 0.4756   |
| H | -2.08744 | 1.66909  | 0.17046  |
| H | 0.37291  | 1.8249   | -0.97604 |
| H | -0.92755 | -2.2008  | 0.23946  |
| C | 1.14358  | 0.07787  | 0.03992  |
| O | 2.20279  | 0.11625  | 0.59689  |
| H | 0.57935  | -1.1434  | -1.82848 |

---

**VK**

---

|   |          |          |          |
|---|----------|----------|----------|
| C | -1.74276 | -0.61439 | 0.88896  |
| C | -1.14643 | -1.36254 | -0.04558 |
| C | 0.27873  | -1.48331 | -0.3381  |
| C | 1.24331  | -0.73091 | 0.15725  |
| H | -1.7665  | -1.97154 | -0.69869 |
| H | -1.18614 | -0.00326 | 1.59255  |
| H | -2.8215  | -0.60331 | 0.98557  |
| O | 2.10834  | -0.08145 | 0.57967  |
| H | 0.62094  | -2.23197 | -1.04398 |

---

**Furan**

---

|   |          |          |          |
|---|----------|----------|----------|
| C | -1.74312 | -0.24465 | 0.       |
| O | -1.7819  | -0.24465 | 1.36198  |
| C | -0.4894  | -0.24465 | 1.79321  |
| C | 0.36377  | -0.24465 | 0.73707  |
| C | -0.45825 | -0.24465 | -0.43868 |
| H | -0.13116 | -0.24465 | -1.46612 |
| H | 1.44106  | -0.24465 | 0.78265  |
| H | -0.3516  | -0.24465 | 2.86098  |
| H | -2.69867 | -0.24465 | -0.49604 |

---

**CBD**

---

|   |          |          |          |
|---|----------|----------|----------|
| C | 1.21665  | 0.70443  | 0.53857  |
| C | 1.86904  | 0.07817  | -0.4737  |
| C | 1.05615  | -1.10218 | -0.2731  |
| C | 0.26345  | -0.52445 | 0.72229  |
| H | 2.61828  | 0.36468  | -1.19394 |
| H | 1.04684  | -2.0871  | -0.72916 |
| H | -0.09034 | -0.99839 | 1.63034  |
| H | 1.32327  | 1.63709  | 1.07423  |



---

**C<sub>4</sub>H<sub>4</sub>**

---

|   |          |          |          |
|---|----------|----------|----------|
| C | 1.76603  | -0.85288 | -0.00028 |
| C | 1.87012  | 0.52172  | -0.00016 |
| C | 0.85848  | 1.2458   | -0.00072 |
| C | -0.50592 | 1.42323  | 0.00072  |
| H | -0.98264 | 1.79451  | -0.90487 |
| H | 1.918    | -1.41628 | -0.9165  |
| H | 1.9186   | -1.41705 | 0.91534  |
| H | -0.98054 | 1.79351  | 0.90786  |

5. Structural parameters for furfural and 2-pyrone pyrolysis transition-state geometries, calculated at G4 level of energy.

---

**TS1**

---

|   |          |          |          |
|---|----------|----------|----------|
| C | -0.69602 | -0.38094 | -1.13446 |
| C | -0.75064 | 0.96971  | -1.18015 |
| C | -2.15753 | 1.29282  | -1.18197 |
| C | -2.85822 | 0.10104  | -1.18485 |
| O | -1.94614 | -0.92807 | -1.04451 |
| H | 0.16421  | -1.02812 | -1.12034 |
| H | 0.0794   | 1.65251  | -1.19815 |
| H | -2.59842 | 2.27728  | -1.20152 |
| C | -4.59542 | 0.45783  | -0.79296 |
| H | -3.53781 | 0.95403  | -0.15505 |
| O | -5.54529 | 0.02255  | -1.35427 |

---

**TS2**

---

|   |          |          |          |
|---|----------|----------|----------|
| C | -0.31677 | 0.51665  | 0.00014  |
| C | 0.74585  | 1.30827  | -0.00005 |
| C | 1.95011  | 0.55154  | -0.00018 |
| C | 1.56185  | -0.74959 | -0.00004 |
| O | 0.26912  | -0.96868 | -0.00004 |
| H | 0.63706  | 2.37948  | 0.00015  |
| H | 2.9612   | 0.91732  | -0.00001 |
| H | 2.10964  | -1.6753  | -0.00023 |
| C | -1.76014 | 0.71787  | -0.00009 |
| H | -1.21006 | -0.5543  | 0.00046  |
| O | -2.72346 | 1.43604  | -0.02977 |

---

---

**TS3**

---

|   |          |         |          |
|---|----------|---------|----------|
| C | -0.25994 | 1.16208 | 0.       |
| C | -0.16149 | 1.11947 | 1.30634  |
| O | -0.06162 | 1.08308 | 2.46354  |
| C | -0.60447 | 2.39839 | -0.74968 |
| C | -1.83772 | 2.83039 | -1.04644 |
| C | -3.1227  | 2.17123 | -0.69738 |
| O | -3.25131 | 1.08928 | -0.17539 |
| H | -0.11307 | 0.22651 | -0.52946 |
| H | 0.23354  | 2.99596 | -1.10734 |
| H | -1.93675 | 3.75515 | -1.60987 |
| H | -4.01666 | 2.77003 | -0.9767  |

---

**TS4**

---

|   |          |          |          |
|---|----------|----------|----------|
| C | -1.28537 | -1.26374 | 0.00264  |
| C | -0.90117 | 0.15061  | 0.00083  |
| C | 0.51142  | 0.46661  | -0.00079 |
| C | 1.24655  | -0.69134 | -0.00027 |
| O | -0.27973 | -2.10573 | 0.00259  |
| H | -2.30623 | -1.58429 | 0.00391  |
| H | -1.64049 | 0.92411  | 0.00071  |
| H | 0.92073  | 1.45523  | -0.00218 |
| C | 2.69541  | -1.21327 | -0.00106 |
| H | 3.2176   | -0.74627 | 0.80772  |
| O | 3.33767  | -2.02438 | -0.71742 |

---

**TS5**

---

|   |          |          |          |
|---|----------|----------|----------|
| C | 0.0359   | -0.05368 | 0.06242  |
| C | 0.27879  | -0.01882 | 1.42433  |
| C | 1.6092   | 0.2982   | 1.81127  |
| O | 2.22517  | 0.52472  | 0.11116  |
| C | 1.23404  | 0.20032  | -0.61671 |
| C | 1.93716  | -0.46589 | 3.31828  |
| O | 2.75633  | -1.19921 | 3.66361  |
| H | -0.44665 | -0.35326 | 2.15215  |
| H | -0.88655 | -0.37402 | -0.39826 |
| H | 1.38924  | 0.06119  | -1.68811 |
| H | 2.01509  | 1.26861  | 2.06949  |

---

**TS6**

---

|   |          |         |          |
|---|----------|---------|----------|
| C | 0.21802  | 0.6686  | 0.       |
| C | 0.37275  | 0.21955 | 1.47073  |
| C | 1.76649  | 0.21904 | 1.9618   |
| C | 1.945    | 0.62046 | 3.24719  |
| C | 0.71378  | 0.92729 | 3.90111  |
| O | 0.22814  | 1.01279 | 4.97026  |
| O | -0.4103  | 1.52689 | -0.48784 |
| H | -0.12614 | -0.7538 | 1.48149  |
| H | 2.59219  | -0.0589 | 1.31978  |
| H | 2.90733  | 0.79616 | 3.72205  |
| H | -0.1426  | 0.87931 | 2.30793  |

---

**TS7**

---

|   |          |          |          |
|---|----------|----------|----------|
| C | -0.98521 | -0.4417  | 0.20925  |
| C | -1.00778 | -0.30104 | 1.5449   |
| C | 0.39733  | -0.13821 | 1.92008  |
| C | 1.20228  | -0.07007 | 0.71789  |
| C | 1.15848  | -1.70542 | 1.8955   |
| O | 0.30988  | -0.34484 | -0.27502 |
| O | 1.90949  | -2.01399 | 2.75652  |
| H | 0.73872  | 0.2756   | 2.85942  |
| H | -1.87106 | -0.33871 | 2.18969  |
| H | -1.75181 | -0.60222 | -0.53227 |
| H | 0.66092  | -2.37913 | 1.17471  |

---

**TS8**

---

|   |          |          |          |
|---|----------|----------|----------|
| C | -0.03058 | 0.30581  | 0.       |
| C | 0.06251  | 0.58646  | 1.42368  |
| C | 1.43114  | 0.3875   | 1.87233  |
| C | 2.07885  | -0.03663 | 0.77484  |
| O | 1.23438  | -0.1402  | -0.30324 |
| C | -1.01902 | 1.31009  | 2.15635  |
| O | -0.83713 | 1.86489  | 3.20918  |
| H | 1.82481  | 0.55761  | 2.86037  |
| H | 3.10704  | -0.30875 | 0.59249  |
| H | -0.51664 | -0.46891 | 1.01631  |
| H | -1.99784 | 1.31582  | 1.64037  |

---

**TS9**

---

|   |          |         |          |
|---|----------|---------|----------|
| C | -0.24465 | 0.79511 | 0.       |
| O | -0.27569 | 0.86181 | 1.35842  |
| C | 1.07661  | 0.89791 | 1.72428  |
| C | 1.97778  | 0.78252 | 0.63318  |
| C | 1.0301   | 0.8041  | -0.47956 |
| C | -1.55702 | 0.75697 | -0.68396 |
| O | -1.6654  | 0.68948 | -1.883   |
| H | 1.28729  | 0.77631 | -1.52777 |
| H | 1.68028  | 1.92535 | 1.42296  |
| H | 1.24046  | 0.74817 | 2.78328  |
| H | -2.43327 | 0.79414 | -0.00784 |

---

**TS10**

---

|   |          |          |         |
|---|----------|----------|---------|
| C | -0.71865 | 0.77982  | 0.      |
| C | -0.68483 | 0.776    | 1.40753 |
| O | 0.47737  | 0.77497  | 1.96076 |
| C | 1.4487   | 0.77902  | 0.6177  |
| C | 0.57922  | 0.78171  | -0.5094 |
| C | -1.86997 | 0.77303  | 2.3369  |
| O | -3.00202 | 0.77347  | 1.93177 |
| H | -1.64563 | 0.78095  | -0.5568 |
| H | 2.04402  | -0.12208 | 0.77258 |
| H | -1.61557 | 0.77043  | 3.41324 |
| H | 2.04324  | 1.6798   | 0.77745 |

---

**TS11**

---

|   |          |          |          |
|---|----------|----------|----------|
| C | -2.73753 | 0.29052  | -0.10489 |
| C | -1.47434 | -0.07532 | 0.04442  |
| C | -0.53196 | -1.05564 | 0.21375  |
| C | 0.82944  | -0.69383 | -0.03005 |
| C | 0.75668  | 0.88213  | -0.08676 |
| O | 1.47062  | 1.78065  | 0.11507  |
| O | 1.87745  | -1.27537 | -0.16004 |
| H | -3.07661 | 1.30034  | 0.08967  |
| H | -3.47041 | -0.42001 | -0.47736 |
| H | -0.7416  | -1.97169 | 0.75226  |
| H | -0.54975 | 0.96199  | -0.22356 |

---

**TS12**

---

|   |          |          |          |
|---|----------|----------|----------|
| C | 2.37718  | 0.55029  | 0.0183   |
| C | 3.35329  | -0.26904 | -0.89868 |
| C | 2.82077  | -1.65003 | -0.66103 |
| C | 1.6973   | -1.29408 | 0.35419  |
| O | 1.11325  | 0.77456  | -0.73809 |
| H | 4.16458  | 0.06186  | -1.51287 |
| H | 3.12378  | -2.59377 | -1.06408 |
| C | 0.53698  | -0.68828 | -0.42848 |
| O | -0.57636 | -1.19194 | -0.7291  |
| H | 1.55336  | -1.86304 | 1.24887  |
| H | 2.74742  | 1.3141   | 0.66977  |

---

**TS13**

---

|   |         |         |          |
|---|---------|---------|----------|
| C | 4.67856 | 1.26107 | 0.83249  |
| C | 3.97757 | 2.06759 | -0.13176 |
| C | 4.7242  | 3.39647 | -0.2166  |
| C | 5.59627 | 3.16855 | 0.74963  |
| O | 6.76451 | 0.76381 | 0.17823  |
| H | 3.09781 | 1.79338 | -0.67556 |
| H | 4.57587 | 4.24931 | -0.84553 |
| C | 7.36    | 1.98991 | 0.05179  |
| O | 8.51311 | 2.33407 | -0.31627 |
| H | 5.73149 | 3.90981 | 1.50934  |
| H | 4.37048 | 1.19921 | 1.85532  |

---

**TS14**

---

|   |          |          |          |
|---|----------|----------|----------|
| C | -0.31751 | -1.15792 | 0.       |
| C | 1.02117  | -1.1737  | 0.       |
| C | 1.77662  | -0.05623 | 0.       |
| C | 1.09825  | 1.20196  | 0.       |
| C | -0.25637 | 1.25206  | 0.       |
| H | -1.06199 | 0.04795  | 0.00001  |
| H | 1.67654  | 2.12086  | 0.       |
| H | 2.40773  | -1.23414 | -0.07408 |
| O | 1.41244  | -2.18508 | -0.00001 |
| H | -2.25789 | -0.04522 | -0.00001 |
| C | -0.80731 | 2.18394  | 0.       |



---

**TS15**

---

|   |          |          |          |
|---|----------|----------|----------|
| O | 0.49391  | -1.27758 | 0.31864  |
| C | -1.49728 | -1.07785 | -0.10914 |
| C | -1.76298 | 0.20893  | -0.22115 |
| C | -1.01316 | 1.35254  | -0.03762 |
| C | 0.29852  | 1.12981  | 0.30319  |
| C | 1.05464  | -0.17641 | 0.08801  |
| H | -1.43889 | 2.34547  | -0.08373 |
| H | -1.74548 | -1.57118 | 0.82451  |
| H | -1.43353 | -1.70737 | -0.99021 |
| O | 2.15667  | 0.07242  | -0.38136 |
| H | 0.93483  | 1.95228  | 0.61132  |

---

**TS16**

---

|   |          |          |          |
|---|----------|----------|----------|
| O | 1.85973  | -1.26903 | -0.57089 |
| C | -2.49743 | -1.09298 | 0.23583  |
| C | -1.86075 | 0.0138   | 0.06156  |
| C | -1.20304 | 1.15714  | -0.11847 |
| C | 0.09036  | 1.07182  | -0.7267  |
| C | 1.71391  | -0.31151 | 0.0795   |
| H | -1.69605 | 2.08177  | 0.19571  |
| H | -2.38755 | -1.66471 | 1.15293  |
| H | -3.14613 | -1.49704 | -0.53577 |
| O | 1.79695  | 0.51455  | 0.92213  |
| H | 0.51797  | 2.08615  | -0.81299 |

---

**TS17**

---

|   |          |          |          |
|---|----------|----------|----------|
| O | -0.31751 | -1.15792 | 0.       |
| C | 1.02117  | -1.1737  | 0.       |
| C | 1.77662  | -0.05623 | 0.       |
| C | 1.09825  | 1.20196  | 0.       |
| C | -0.25637 | 1.25206  | 0.       |
| C | -1.06199 | 0.04795  | 0.00001  |
| H | 0.4223   | 2.38427  | -0.03385 |
| H | 2.85551  | -0.12693 | 0.       |
| H | 1.41244  | -2.18508 | -0.00001 |
| O | -2.25789 | -0.04522 | -0.00001 |
| H | -0.80731 | 2.18394  | 0.       |

---

**TS18**

---

|   |          |          |          |
|---|----------|----------|----------|
| O | 0.34656  | -1.15034 | -0.79482 |
| C | -1.04513 | -1.10808 | 0.04204  |
| C | -1.76628 | 0.01784  | -0.20836 |
| C | -1.20539 | 1.3115   | -0.09298 |
| C | 0.2583   | 1.27189  | 0.19694  |
| C | 1.10795  | 0.01622  | -0.98267 |
| H | 0.29128  | 1.50821  | 1.27328  |
| H | -2.82688 | -0.11262 | -0.38106 |
| H | -1.48807 | -2.09392 | 0.14594  |
| O | 2.2524   | -0.11965 | -1.2462  |
| H | 0.80865  | 2.0893   | -0.26806 |

---

**TS19**

---

|   |          |          |          |
|---|----------|----------|----------|
| O | -1.23916 | -0.81031 | 0.00007  |
| C | -1.64025 | 0.50647  | -0.00021 |
| C | -0.63081 | 1.38836  | 0.00013  |
| C | 0.5976   | 0.61323  | 0.0001   |
| C | 1.88916  | 0.95986  | 0.00004  |
| C | 0.15576  | -0.82087 | 0.00015  |
| H | 2.20848  | 1.99577  | -0.00056 |
| H | -1.14353 | 1.19044  | 1.26462  |
| H | -2.71055 | 0.64888  | 0.00027  |
| O | 0.78158  | -1.83733 | -0.00017 |
| H | 2.65372  | 0.19099  | 0.00032  |

---

**TS20**

---

|   |          |          |          |
|---|----------|----------|----------|
| O | -0.98806 | 1.1269   | 0.00058  |
| C | -1.71932 | -0.70128 | 0.00037  |
| C | -0.54035 | -1.52349 | -0.00086 |
| C | 0.59171  | -0.62311 | -0.00078 |
| C | 1.88016  | -1.0137  | 0.00065  |
| C | 0.16245  | 0.82289  | -0.00028 |
| H | 2.13014  | -2.06942 | 0.00056  |
| H | -2.35792 | -0.85886 | -0.88028 |
| H | -2.35752 | -0.85935 | 0.88111  |
| O | 0.8402   | 1.81291  | -0.00037 |
| H | 2.68574  | -0.28339 | 0.00201  |

---

**TS21**

---

|   |         |          |          |
|---|---------|----------|----------|
| O | 0.32412 | 0.06367  | -0.16579 |
| C | 0.17252 | 0.02314  | 1.16721  |
| C | 1.21103 | -0.01915 | 2.02767  |
| C | 2.53195 | -0.0203  | 1.47826  |
| C | 2.72021 | 0.02001  | 0.13602  |
| C | 1.60386 | 0.06543  | -0.78796 |
| H | 3.38734 | -0.05379 | 2.14433  |
| H | 1.03436 | -0.05075 | 3.09322  |
| H | 0.79806 | -1.28727 | 1.59617  |
| O | 1.63321 | 0.10334  | -1.98526 |
| H | 3.70329 | 0.02049  | -0.31492 |

---

**TS22**

---

|   |          |          |          |
|---|----------|----------|----------|
| O | 0.40881  | -1.16514 | 1.21052  |
| C | -0.88903 | -1.37455 | 1.21029  |
| C | -1.77162 | -0.14589 | -0.00006 |
| C | -1.09901 | 1.18112  | -0.00001 |
| C | 0.2348   | 1.26602  | 0.00005  |
| C | 1.06216  | 0.06803  | 0.00003  |
| H | -1.70693 | 2.0841   | 0.00001  |
| H | -2.45783 | -0.24953 | -0.85611 |
| H | -2.45727 | -0.24976 | 0.85642  |
| O | 2.2521   | 0.00989  | -0.00009 |
| H | 0.77775  | 2.20391  | 0.00007  |

---

**TS23**

---

|   |          |          |          |
|---|----------|----------|----------|
| C | -0.20627 | 0.78527  | 0.7737   |
| C | -0.40529 | -0.7513  | 0.72263  |
| C | 1.64284  | 0.10167  | -0.47147 |
| H | -0.66228 | -1.47559 | 1.48905  |
| H | 2.53819  | 0.01763  | -1.0704  |
| C | -1.58364 | -0.28666 | 0.01521  |
| H | -0.44722 | 1.32628  | 1.68703  |
| O | -2.62935 | -0.29631 | -0.56554 |
| O | 1.41756  | -1.1621  | -0.20399 |
| C | 0.98123  | 1.18587  | -0.06226 |
| H | 1.24349  | 2.20928  | -0.28227 |

---

**TS24**

---

|   |          |          |          |
|---|----------|----------|----------|
| C | -1.32071 | 0.92343  | -0.12533 |
| C | -0.02168 | 0.97828  | 0.40837  |
| C | 0.31666  | -0.5533  | 0.92207  |
| C | -0.6001  | -1.14546 | -0.11612 |
| O | -1.61684 | -0.30507 | -0.45928 |
| H | -2.07341 | 1.67877  | -0.28192 |
| H | 0.37543  | 1.8455   | 0.91915  |
| H | -0.8301  | -2.19271 | -0.232   |
| C | 1.1515   | -0.00426 | -0.07453 |
| O | 2.22774  | 0.10508  | -0.59496 |
| H | 0.48682  | -0.92377 | 1.94189  |

---

**TS25**

---

|   |          |          |          |
|---|----------|----------|----------|
| C | 0.17168  | 0.92394  | -0.6084  |
| C | 0.17761  | -0.54656 | -0.79175 |
| C | -1.71396 | -0.21905 | 0.3662   |
| H | 0.76362  | -1.20529 | -1.40045 |
| H | -2.38517 | -0.65381 | 1.09569  |
| C | 1.2473   | 0.30017  | 0.1443   |
| H | 1.61389  | 1.37711  | -0.99943 |
| O | 2.24313  | -0.16134 | 0.61134  |
| O | -0.85256 | -1.15337 | -0.0348  |
| C | -1.20532 | 1.0205   | 0.36768  |
| H | -1.76107 | 1.93257  | 0.24613  |

**6. Master equation parameters, rate coefficients calculations and comparing with the experimental results**

---

**Furfural decomposition at P= 1 atm**

---

| T (K) | Furfural conversion % | Number of collisions | Number of trials |
|-------|-----------------------|----------------------|------------------|
| 1400  | 31.63                 | 6.00E+05             | 8.00E+05         |
| 1500  | 62.63                 | 2.50E+05             | 1.00E+06         |
| 1600  | 61.26                 | 8.00E+04             | 5.00E+06         |
| 1700  | 25.34                 | 1.00E+04             | 1.00E+07         |
| 1800  | 44.56                 | 1.00E+04             | 1.00E+07         |
| 1900  | 64.59                 | 1.00E+04             | 1.00E+07         |
| 2000  | 80.7                  | 1.00E+04             | 1.00E+07         |
| 2100  | 90.97                 | 1.00E+04             | 1.00E+07         |

---

**Furfural decomposition at P= 10 atm**

---

| T (K) | Furfural conversion % | Number of collisions | Number of trials |
|-------|-----------------------|----------------------|------------------|
| 1500  | 54.65                 | 2.00E+05             | 1.50E+06         |
| 1600  | 40.35                 | 2.50E+05             | 1.80E+06         |
| 1700  | 79.38                 | 2.50E+05             | 1.80E+06         |
| 1800  | 97.98                 | 2.50E+05             | 1.00E+05         |
| 1900  | 99.95                 | 2.50E+05             | 1.00E+05         |
| 2000  | 100.00                | 2.50E+05             | 1.00E+05         |
| 2100  | 100.00                | 1.25E+05             | 5.00E+06         |

---

**Furfural decomposition at P= 50 atm**

---

| T (K) | Furfural conversion % | Number of collisions | Number of trials |
|-------|-----------------------|----------------------|------------------|
| 1500  | 73.82                 | 5.24E-01             | 1.05E+03         |
| 1600  | 44.48                 | 1.00E+06             | 4.00E+05         |
| 1700  | 64.08                 | 5.00E+05             | 1.50E+06         |
| 1800  | 76.87                 | 2.50E+05             | 1.00E+05         |
| 1900  | 96.72                 | 2.50E+05             | 1.00E+05         |
| 2000  | 99.87                 | 2.50E+05             | 1.00E+05         |
| 2100  | 99.99                 | 2.50E+05             | 1.00E+05         |

---

**Furfural decomposition at P= 100 atm**

---

| T (K) | Furfural conversion % | Number of collisions | Number of trials |
|-------|-----------------------|----------------------|------------------|
| 1500  | 66.39                 | 7.39E-01             | 1.05E+03         |
| 1600  | 47.48                 | 2.00E+06             | 2.00E+05         |
| 1700  | 58.63                 | 7.50E+05             | 8.00E+05         |
| 1800  | 58.71                 | 2.50E+05             | 1.00E+05         |
| 1900  | 89.18                 | 2.50E+05             | 1.00E+05         |
| 2000  | 99.13                 | 2.50E+05             | 1.00E+05         |
| 2100  | 99.96                 | 2.50E+05             | 1.00E+05         |



---

**2-Pyrone decomposition at P= 1 atm**

---

| T (K) | 2-Pyrone conversion % | Number of collisions | Number of trials |
|-------|-----------------------|----------------------|------------------|
| 1400  | 51.54                 | 3.50E+06             | 1.00E+05         |
| 1500  | 58.16                 | 8.00E+05             | 3.00E+05         |
| 1600  | 56.57                 | 2.00E+05             | 5.00E+05         |
| 1700  | 70.41                 | 1.00E+05             | 1.00E+06         |
| 1800  | 94.04                 | 1.00E+05             | 1.00E+06         |
| 1900  | 99.62                 | 1.00E+05             | 1.00E+06         |
| 2000  | 99.99                 | 1.00E+05             | 1.00E+06         |
| 2100  | 100.00                | 1.00E+05             | 1.00E+06         |

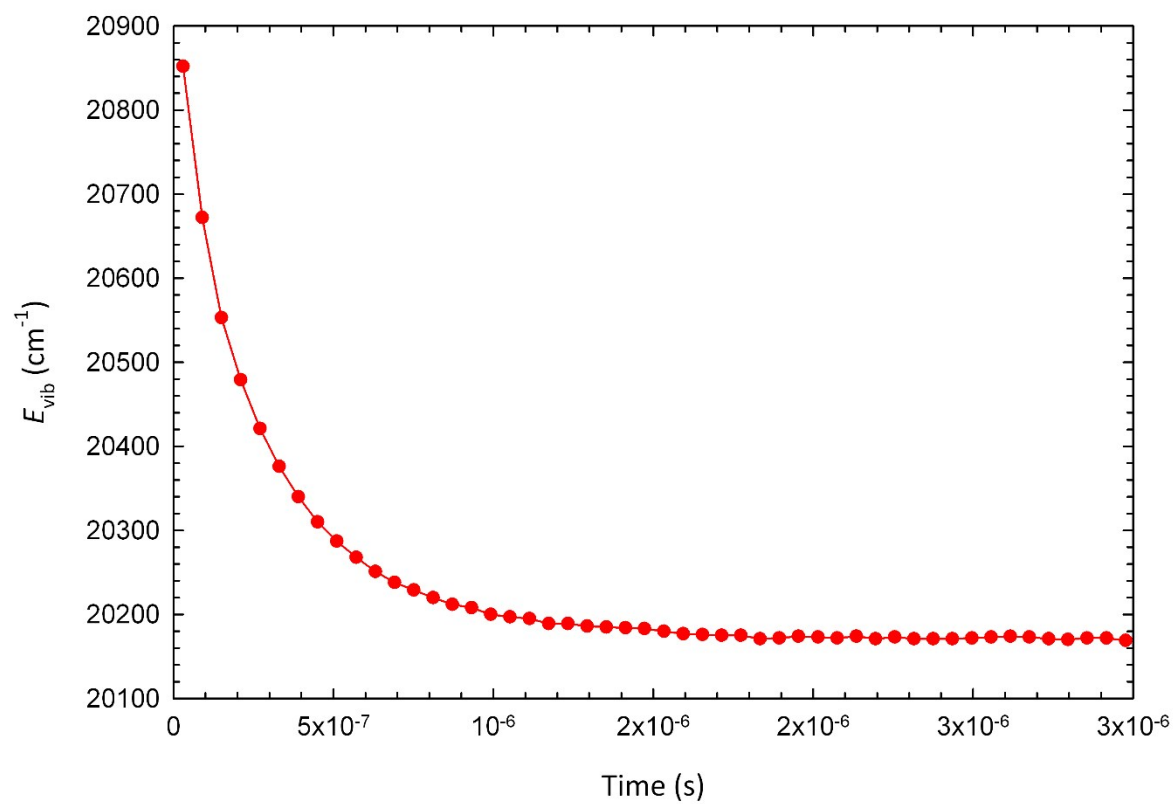

**Figure S1:** Vibrational energy of furfural dissociation as a function of time at 1800 K and 1 atm.

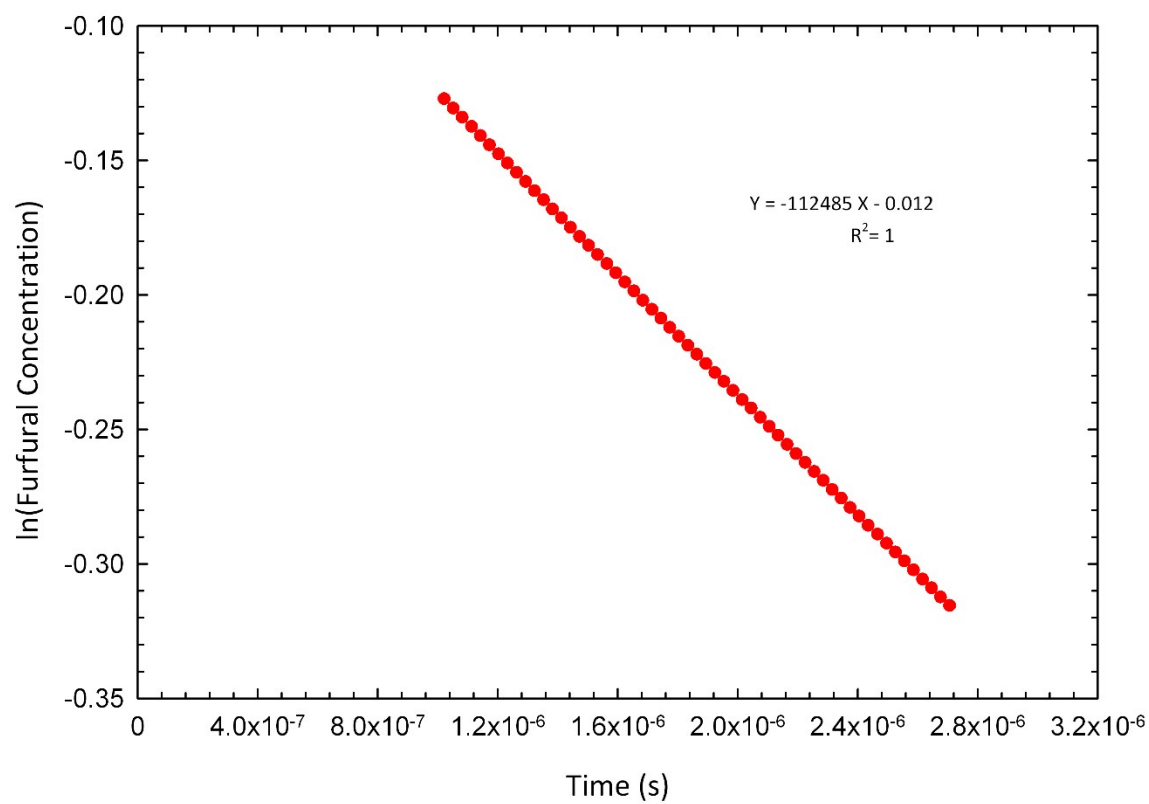

**Figure S2:** The natural logarithm of furfural concentration versus time for a first-order reaction at 1800 K and 1 atm.

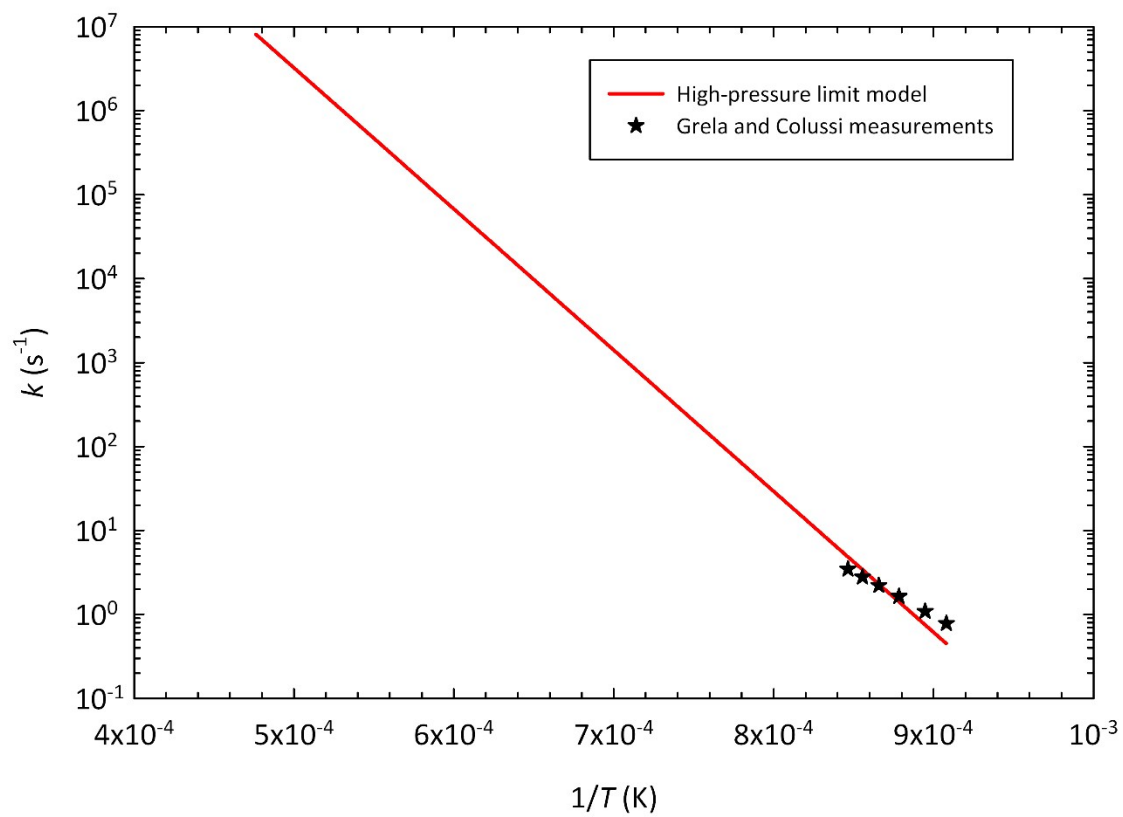

**Figure S3:** Comparing the high-pressure limit model with Grela and Colussi measurements.

7. Rate coefficients of furfural pyrolysis to its products as a function of temperature and pressure.

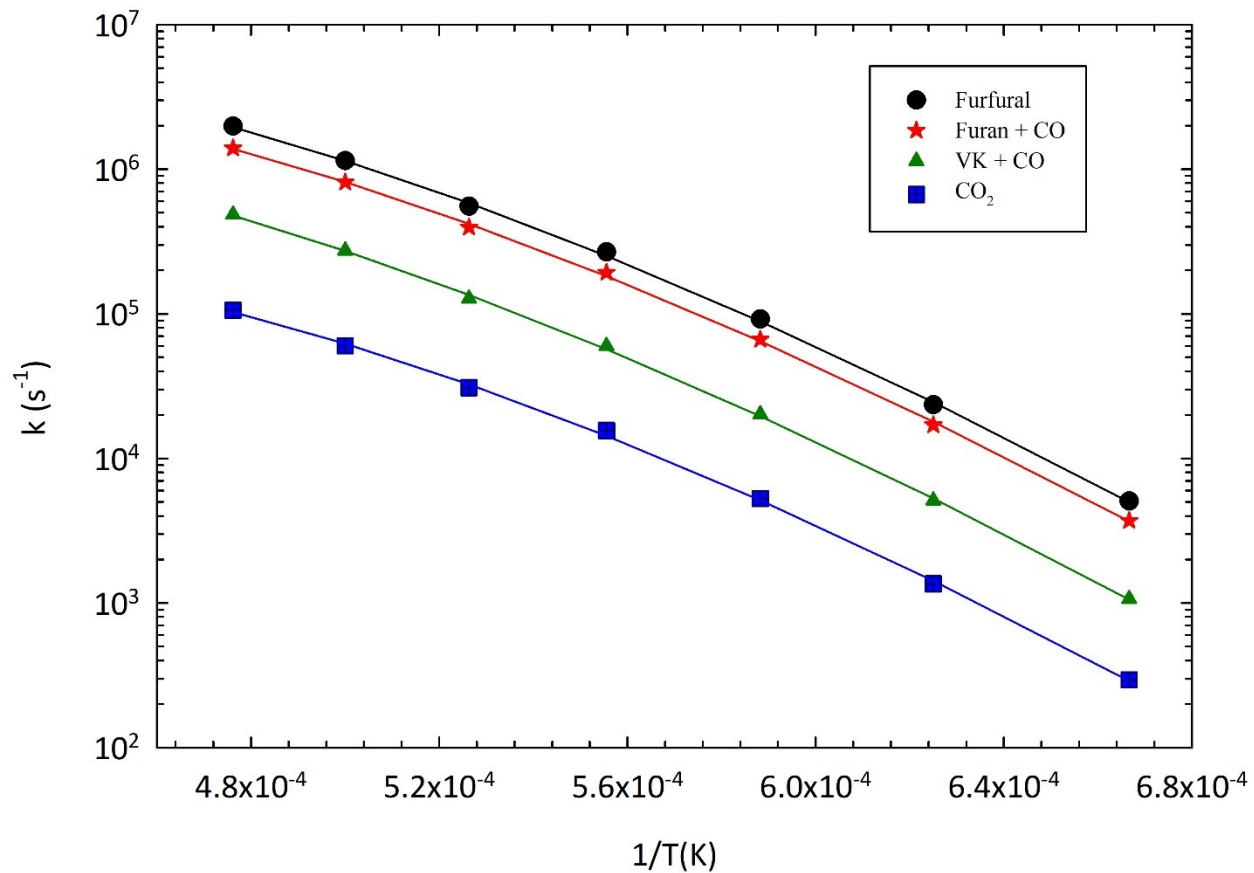

Figure S4: Calculated rate coefficients (dot points) and model fits (solid lines) of furfural pyrolysis to its main products at 10 atm and temperature range 1500 – 2100 K.

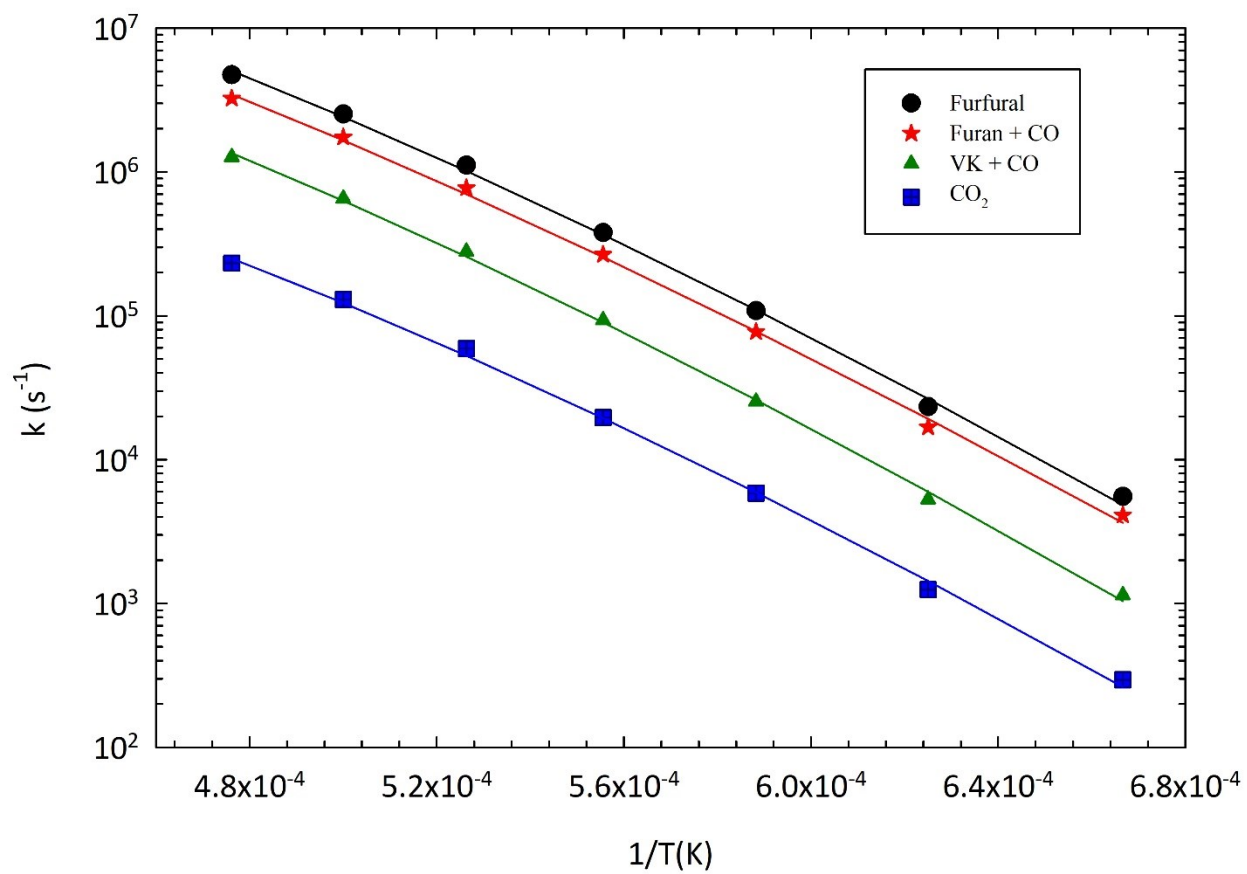

**Figure S5:** Calculated rate coefficients (dot points) and model fits (solid lines) of furfural pyrolysis to its main products at 50 atm and temperature range 1500 – 2100 K.

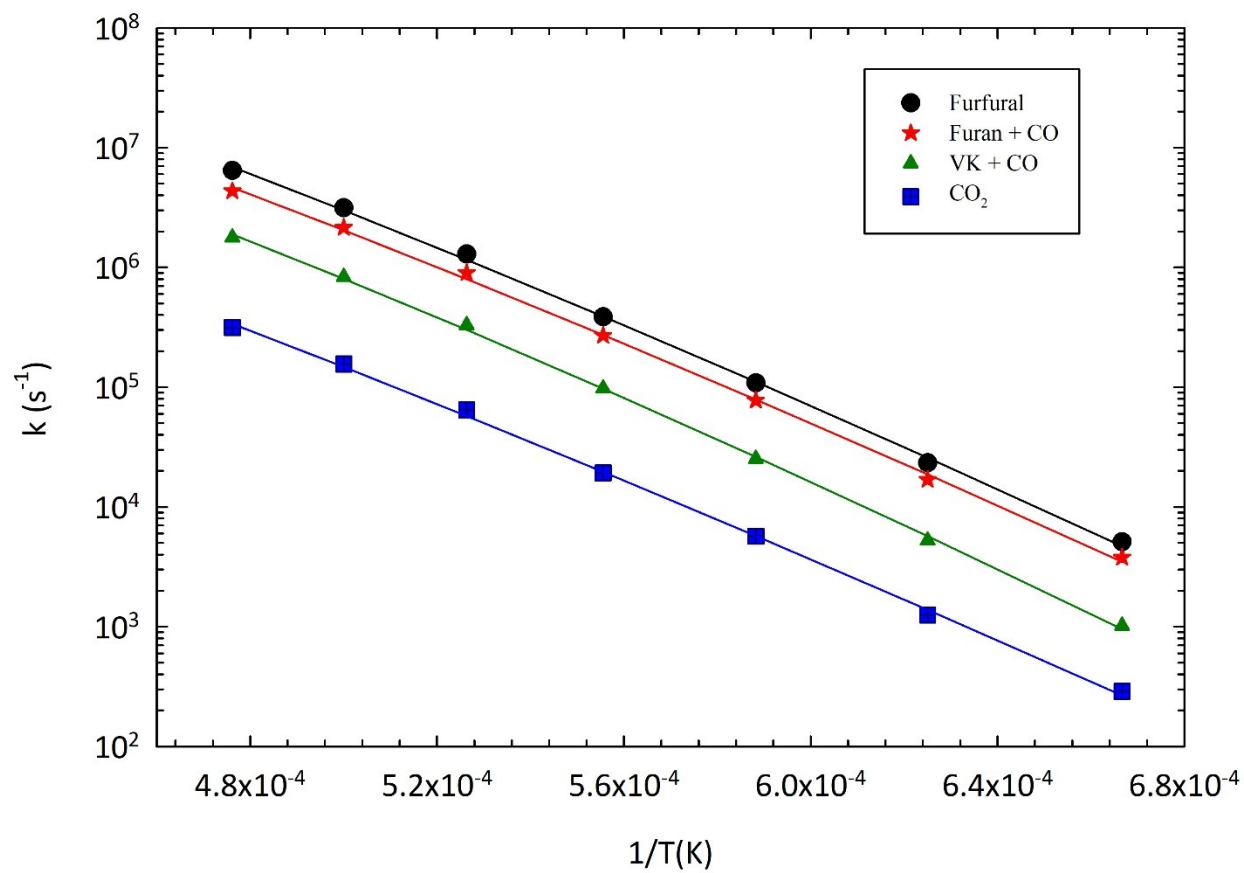

**Figure S6:** Calculated rate coefficients (dot points) and model fits (solid lines) of furfural pyrolysis to its main products at 100 atm and temperature range 1500 – 2100 K.

8. Branching Ratio of furfural and 2-pyrone pyrolysis products as function of temperature and pressure.

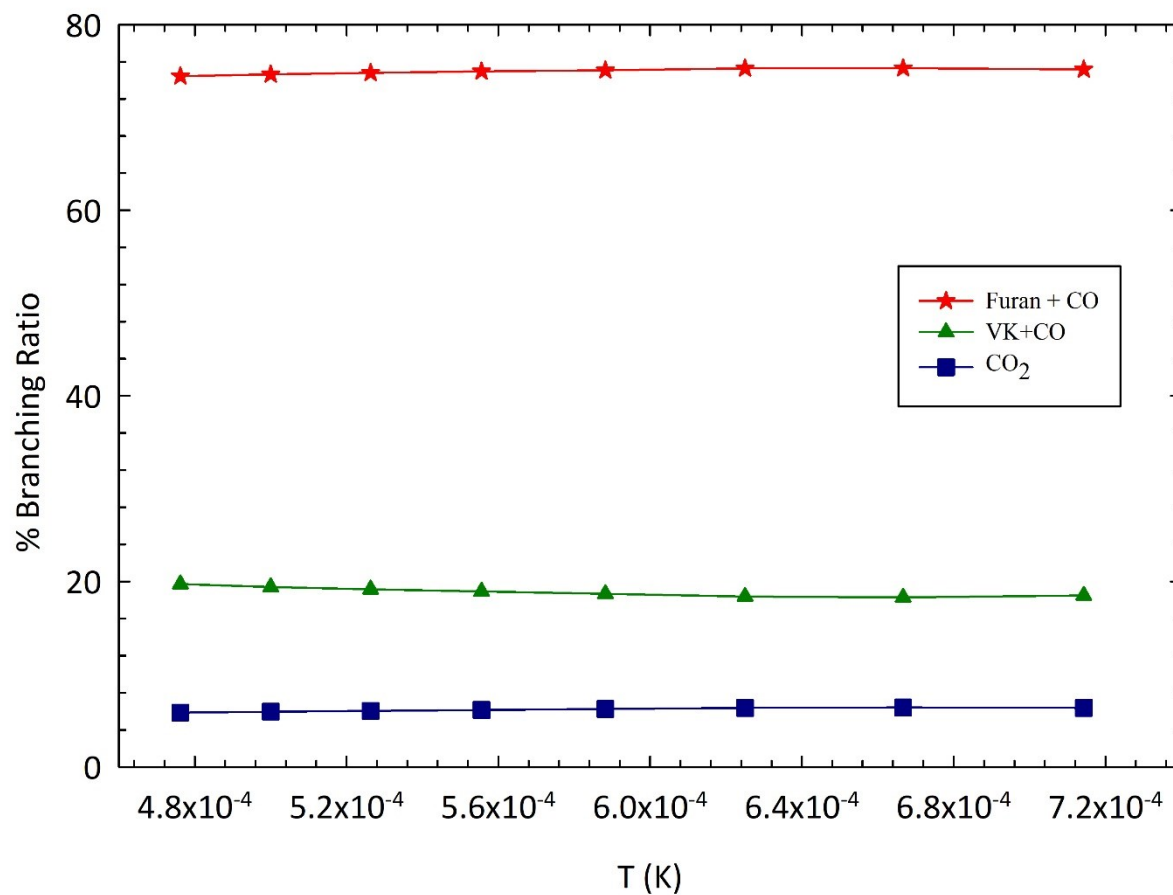

Figure S7: Calculated branching fractions of furfural pyrolysis products as a function of temperature (1400 – 2100 K) and at 1 atm.



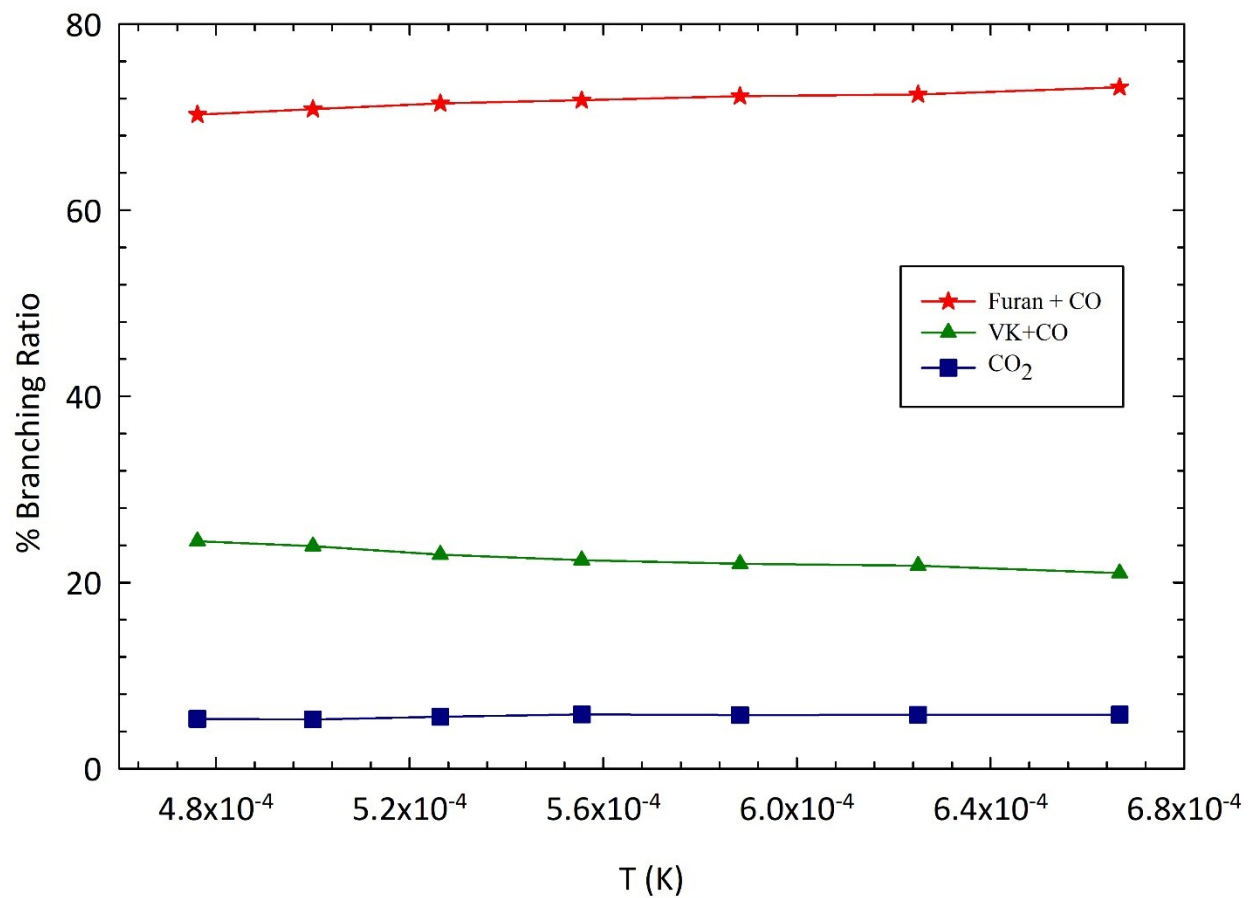

**Figure S8:** Calculated branching fractions of furfural pyrolysis products as a function of temperature (1500 – 2100 K) and at 10 atm.

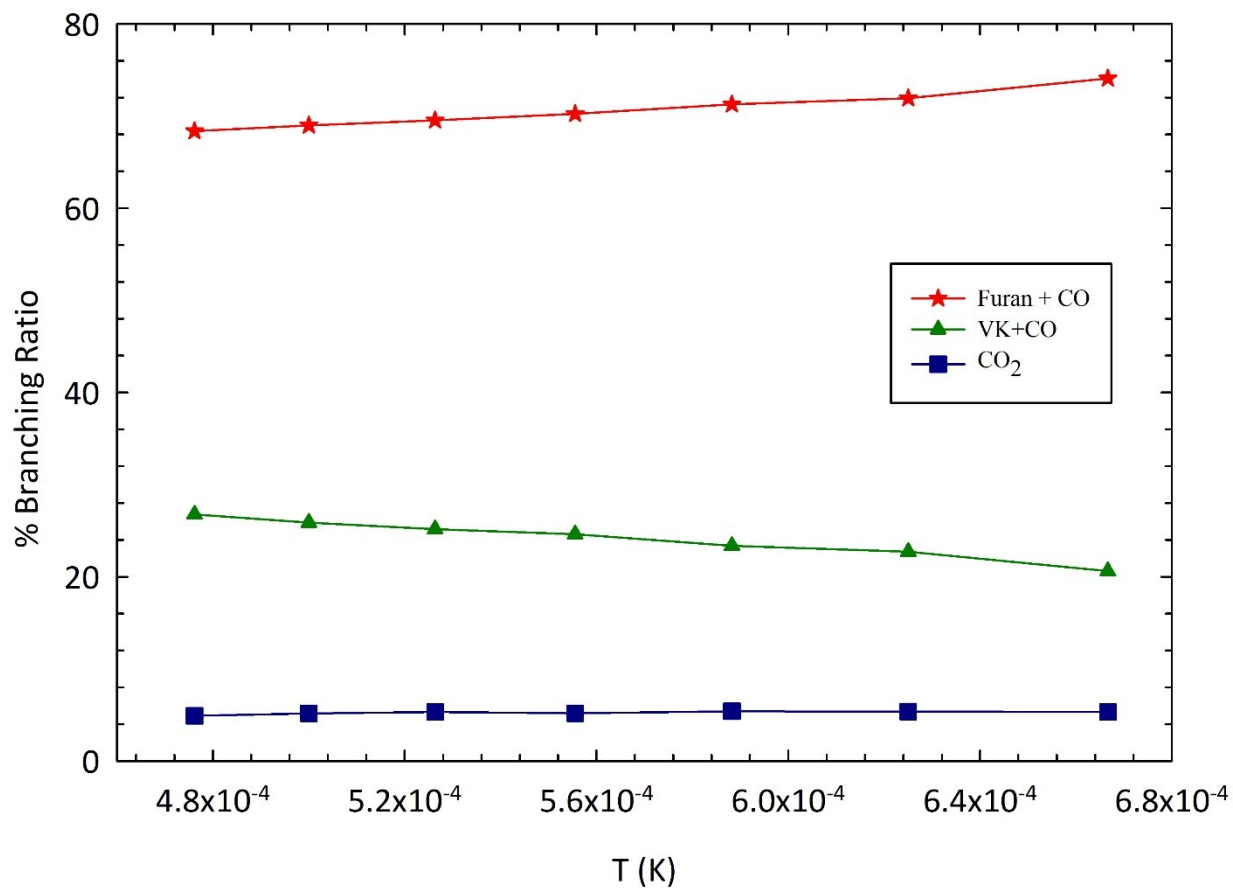

**Figure S9:** Calculated branching fractions of furfural pyrolysis products as a function of temperature (1500 – 2100 K) and at 50 atm.

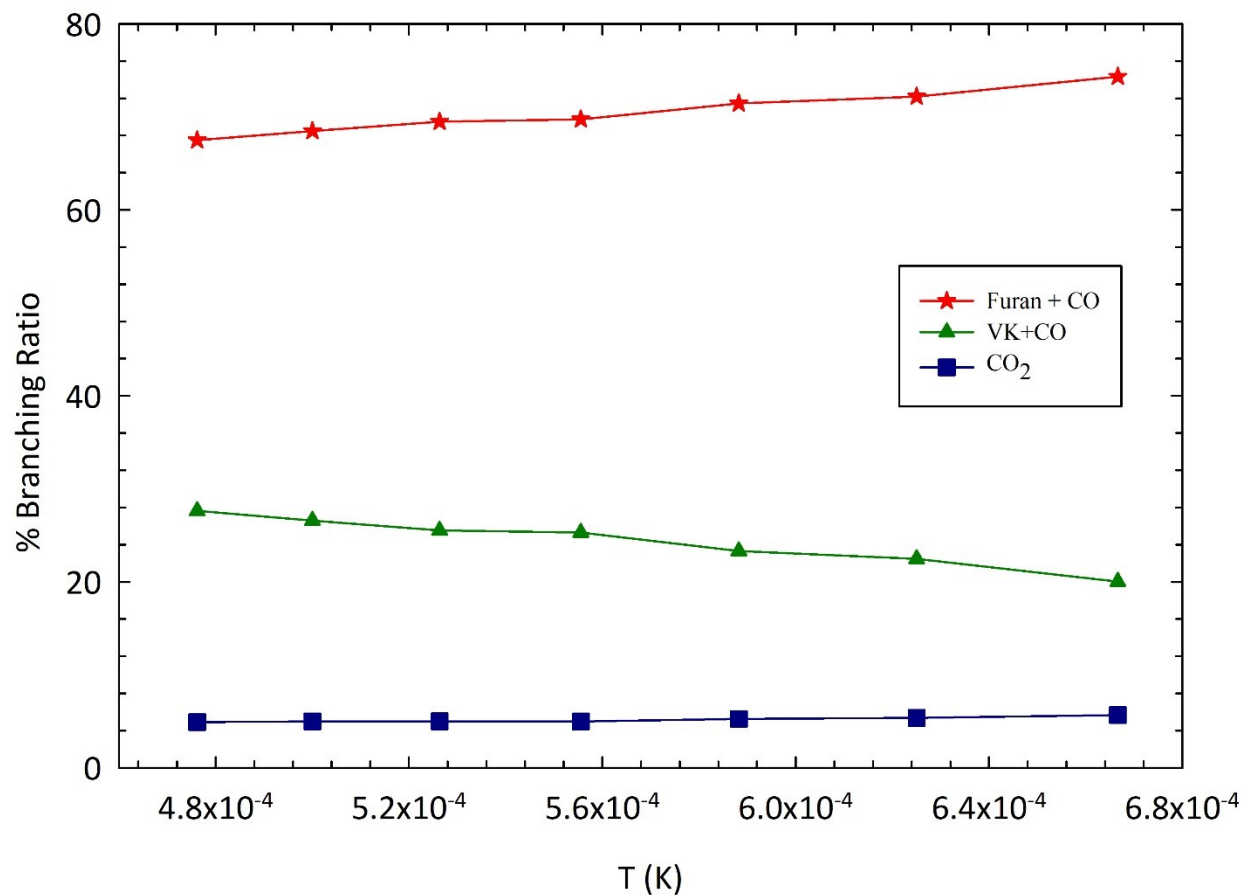

**Figure S10:** Calculated branching fractions of furfural pyrolysis products as a function of temperature (1500 – 2100 K) and at 100 atm.

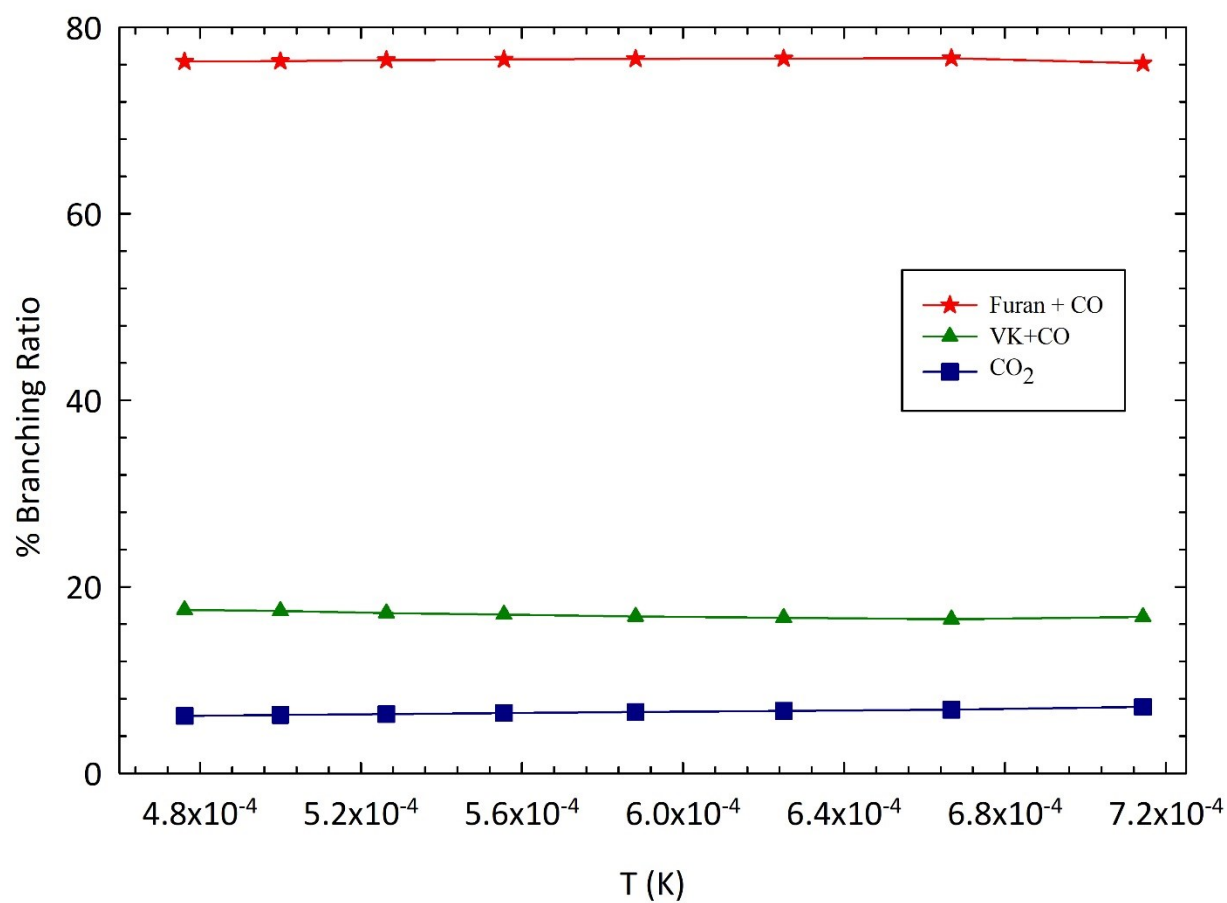

**Figure S11:** Obtained branching ratio of 2-pyrone dissociation products as a function of temperature and (1400 – 2100 K) at 1 atm.
